# Supplementary material for: E3 ubiquitin ligase RNF5 attenuates pathological cardiac hypertrophy through STING
Source: PubMed Central journal article supplement (PMC9587004; doi:10.1038/s41419-022-05231-8), 2022-10-21
Supplement: 41419_2022_5231_MOESM3_ESM.pdf [file 41419_2022_5231_MOESM3_ESM.pdf]

**Figure1-C**

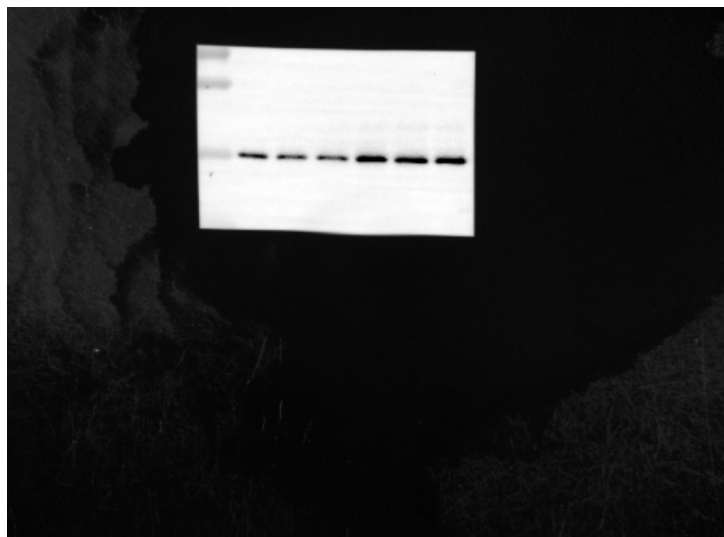

**ANP**

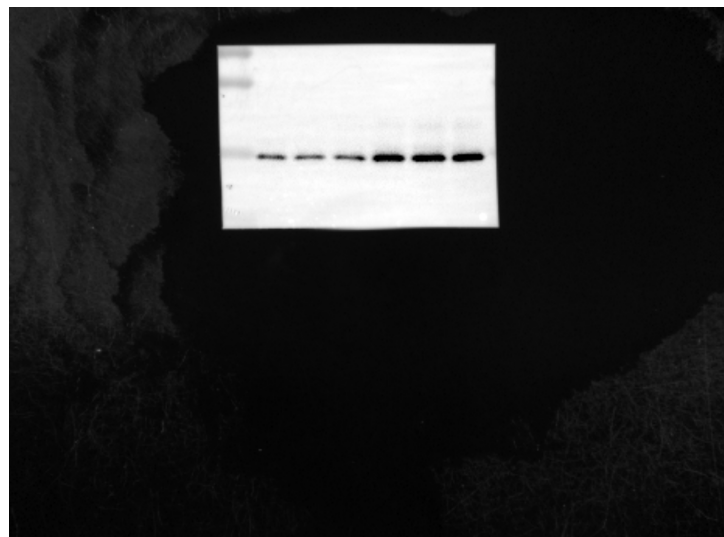

**BNP**

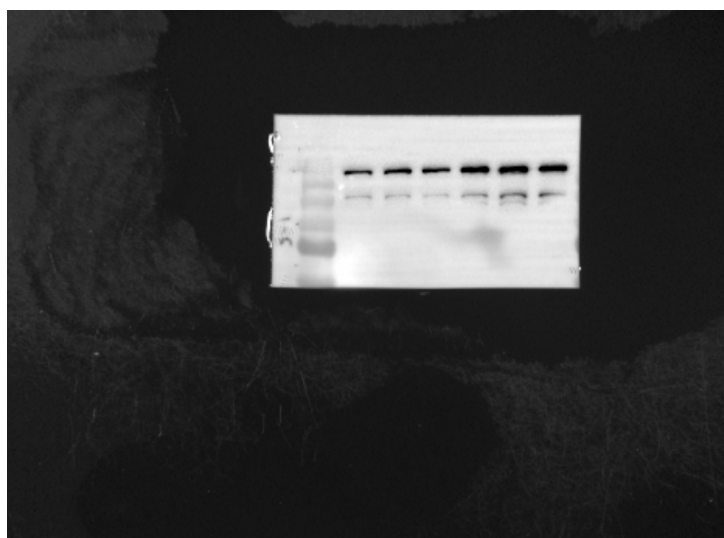

**MYH7**

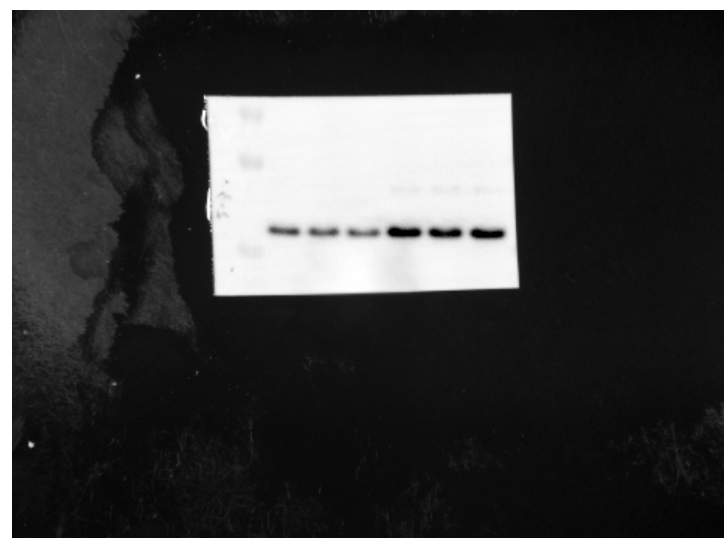

**RNF5**

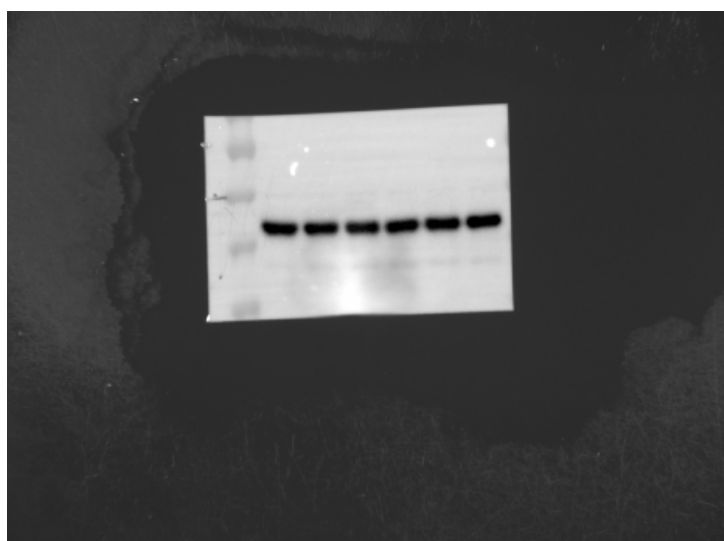

**GAPDH**

**Figure1-E**

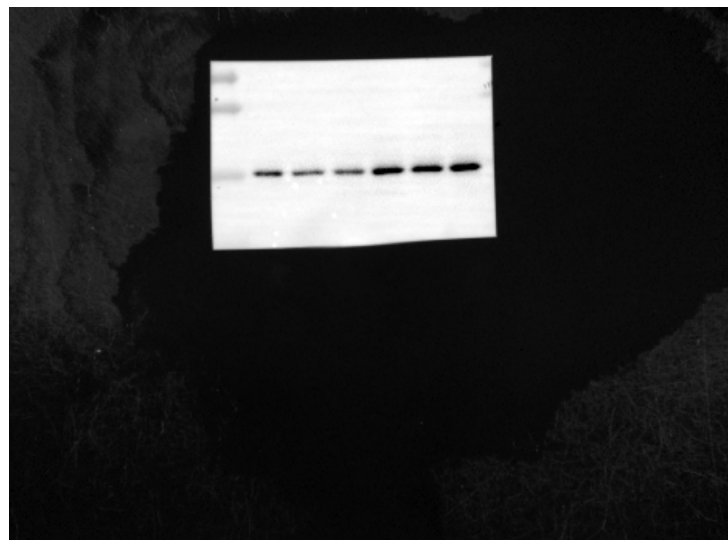

**ANP**

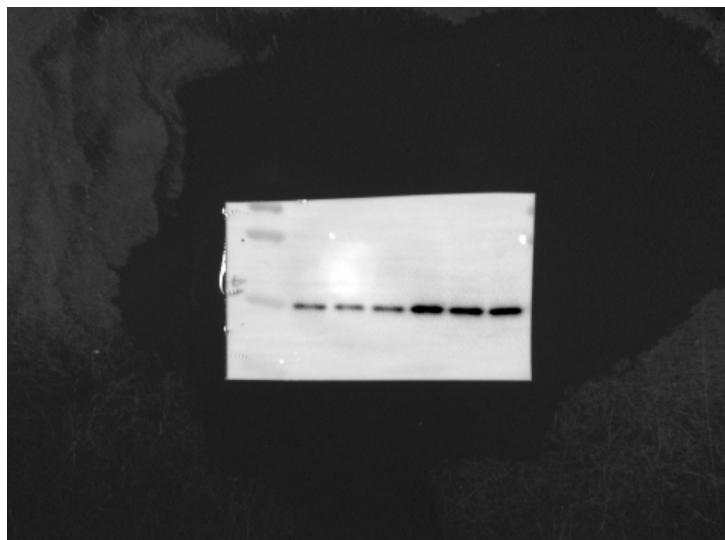

**BNP**

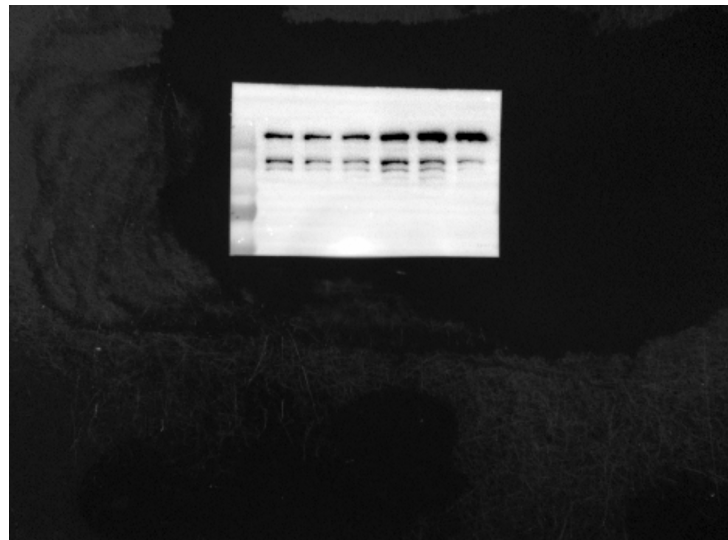

**MYH7**

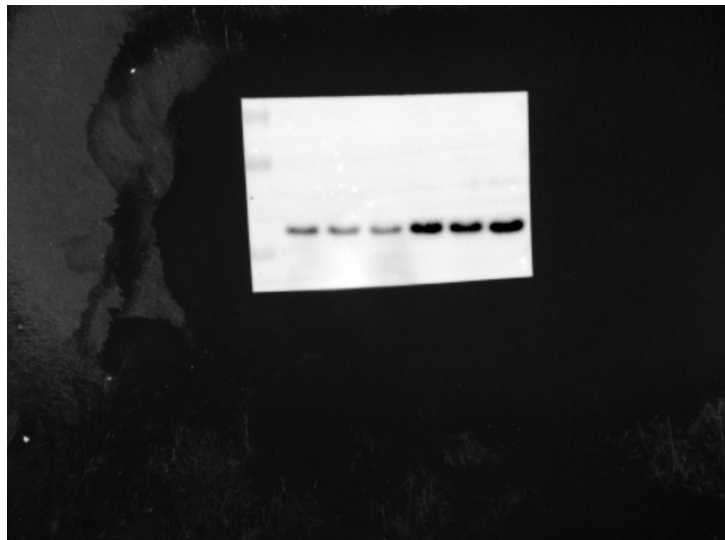

**RNF5**

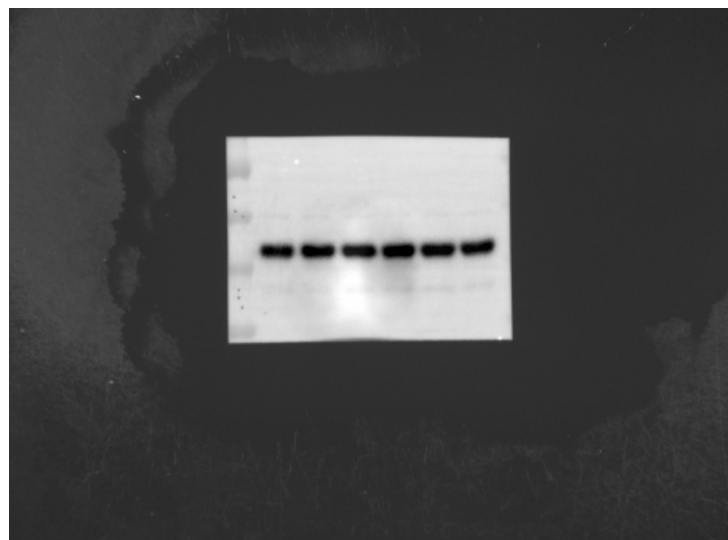

**GAPDH**

**Figure2-A**

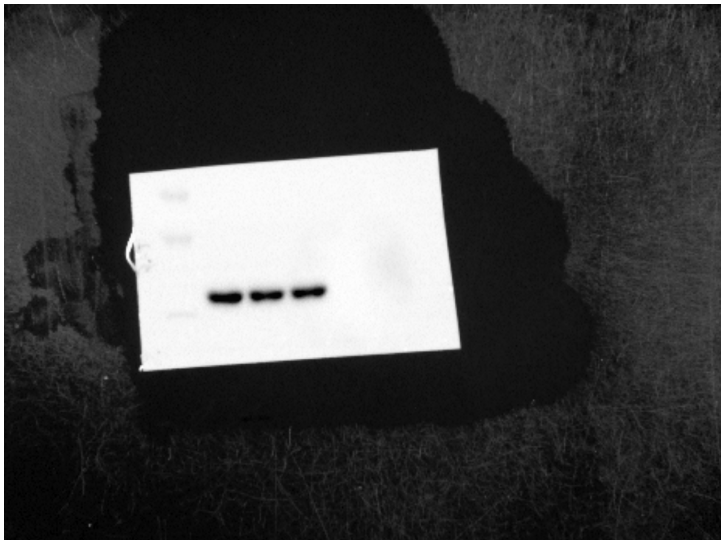

**RNF5**

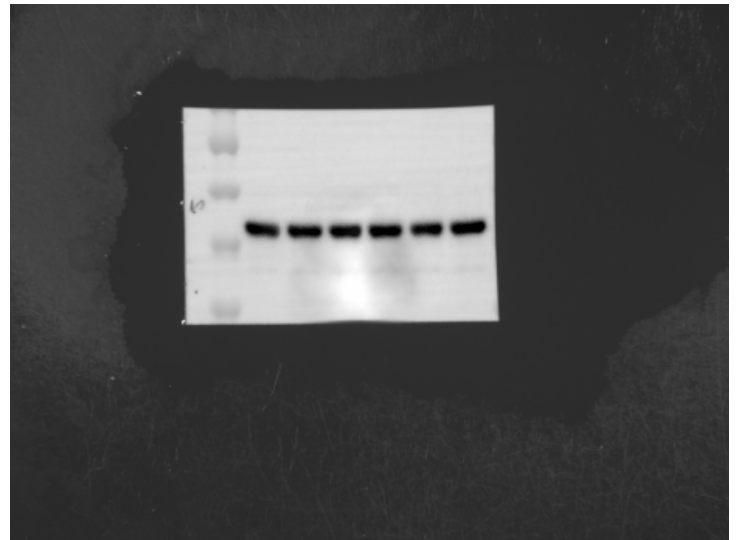

**GAPDH**

**Figure2-G**

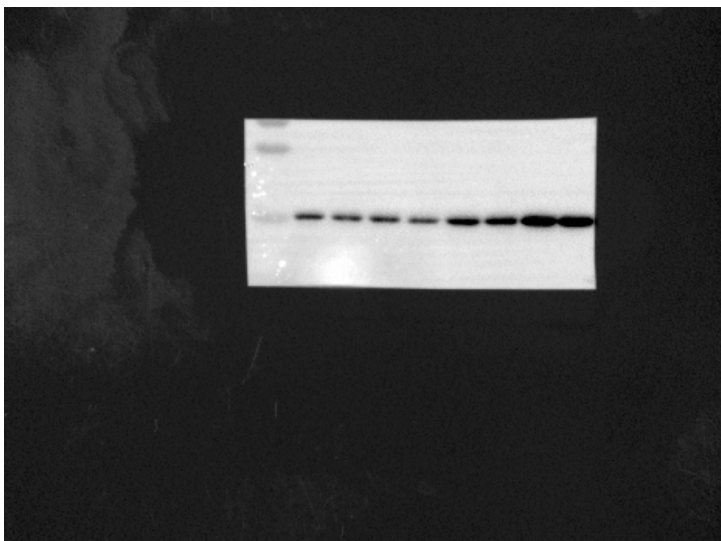

**ANP**

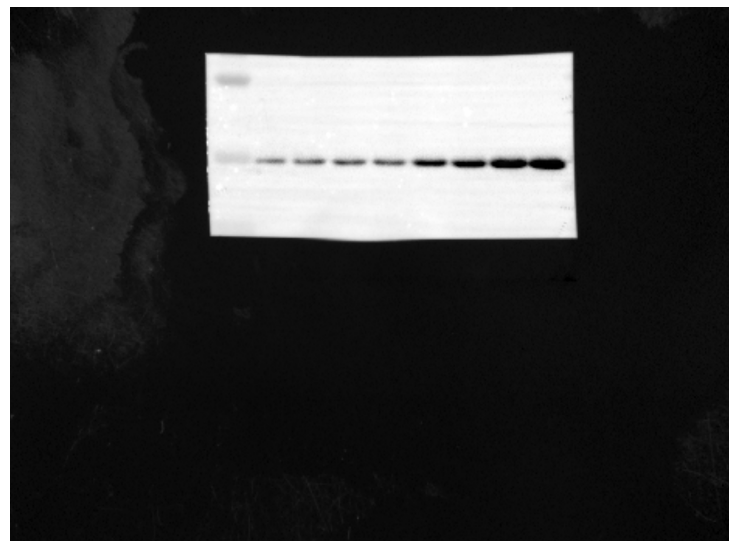

**BNP**

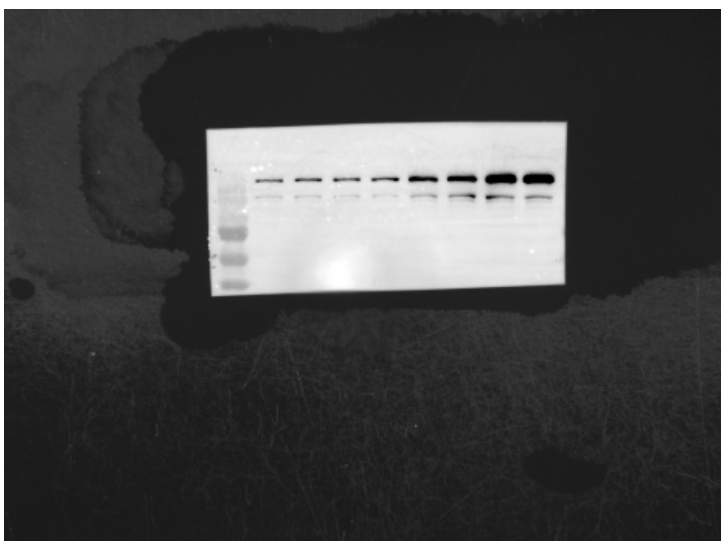

**MYH7**

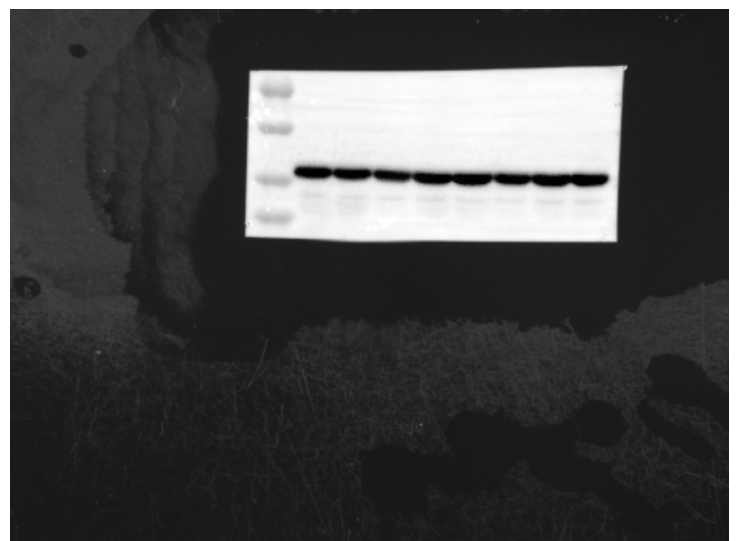

**GAPDH**

Figure3-C

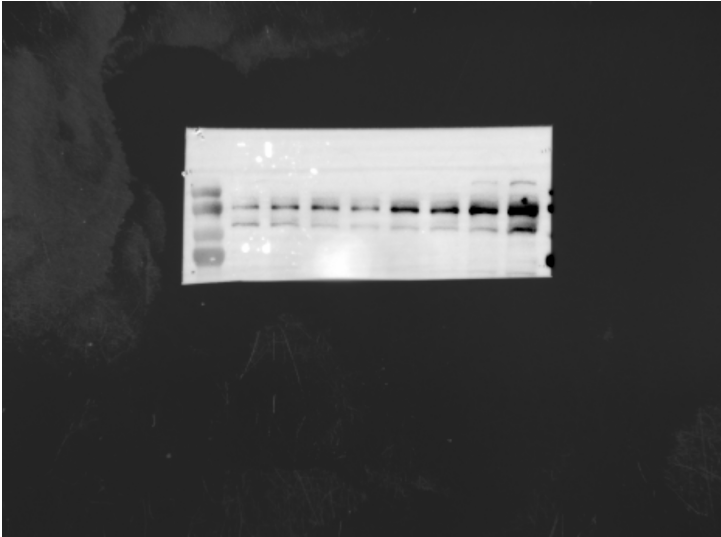

COL1A1

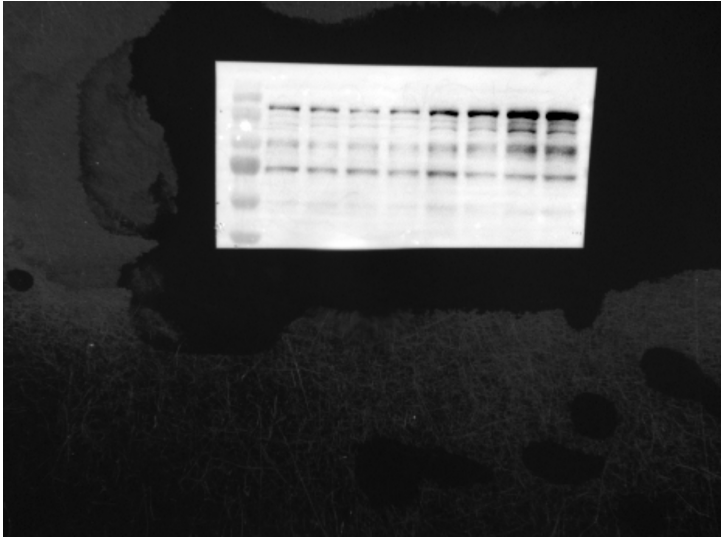

COL3A1

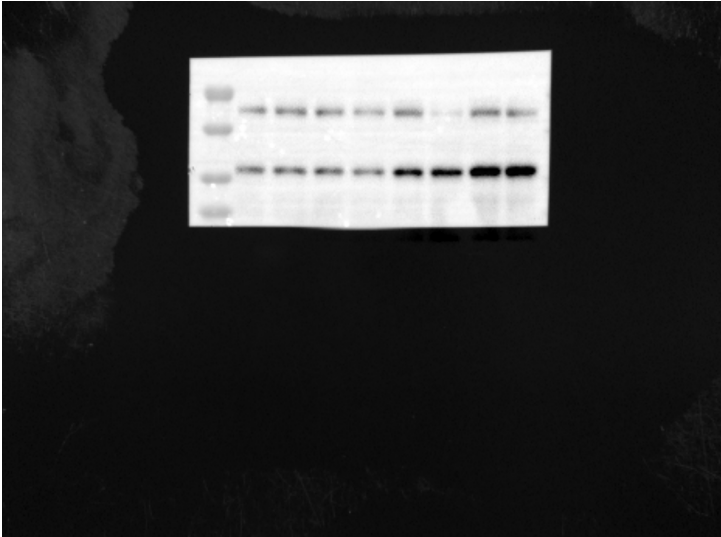

CTGF

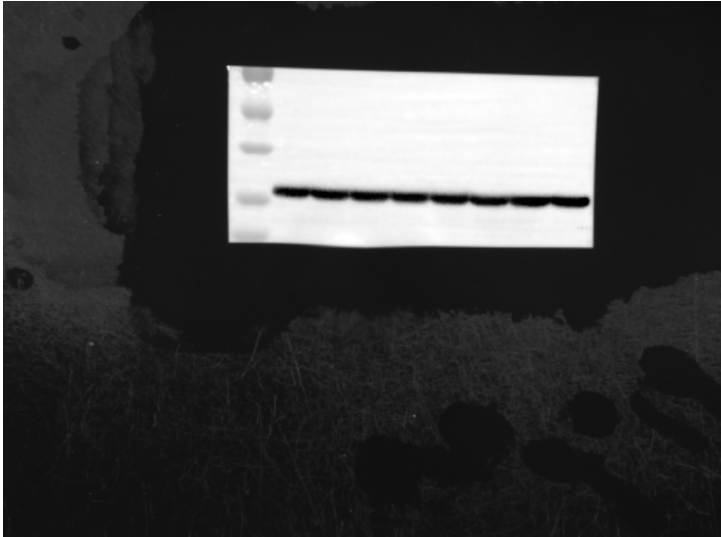

GAPDH

**Figure3-E**

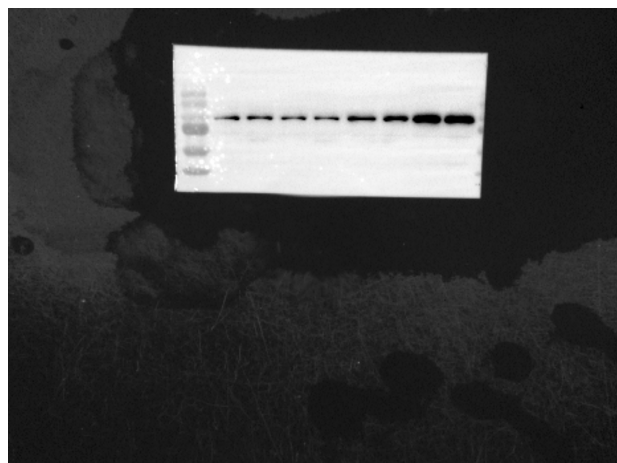

**P-IKK $\beta$**

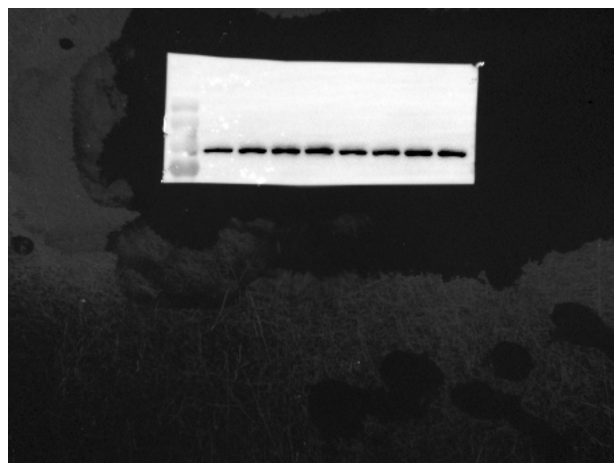

**IKK $\beta$**

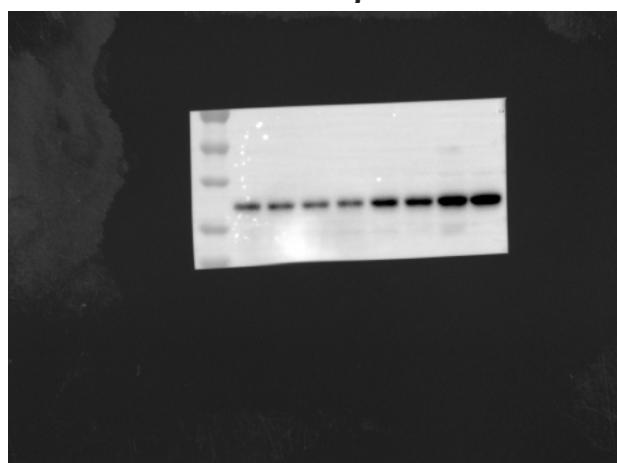

**P-IKB $\alpha$**

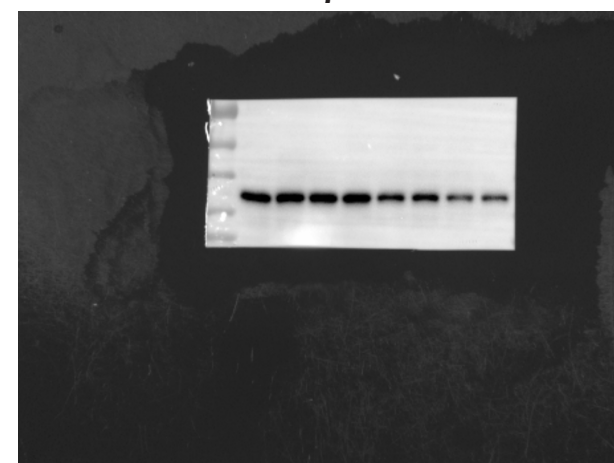

**IKB $\alpha$**

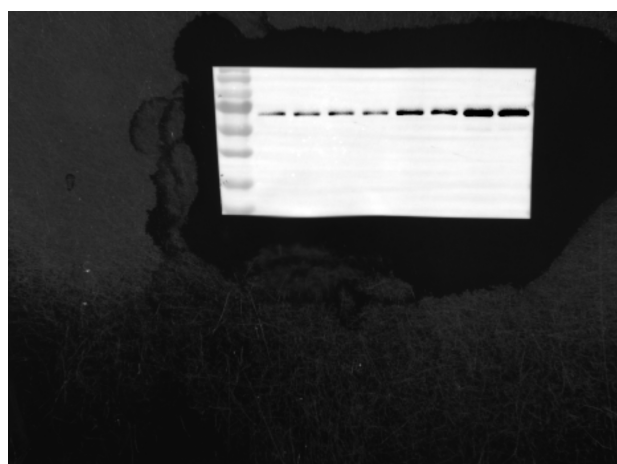

**P-P65**

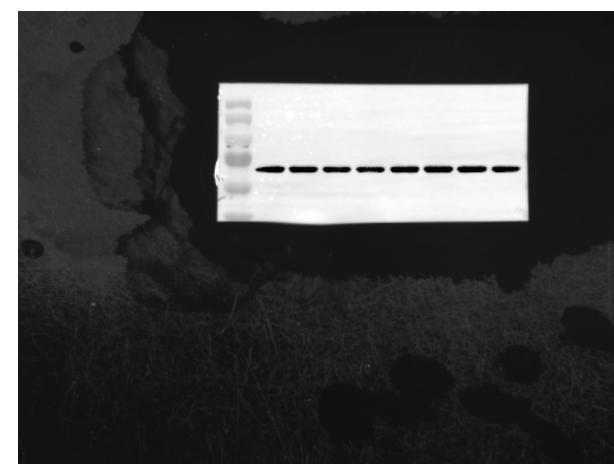

**P65**

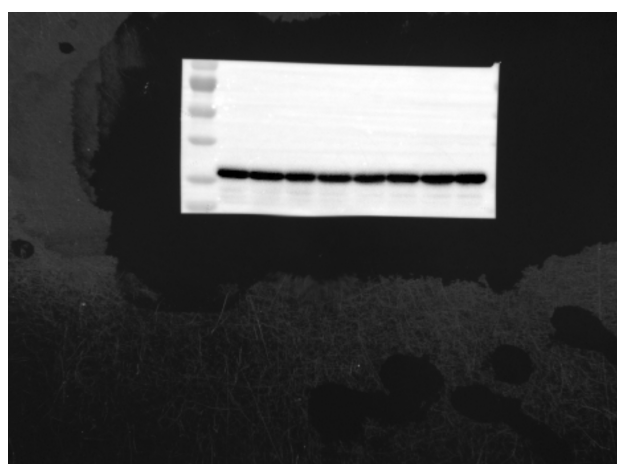

**GAPDH**

**Figure4-A**

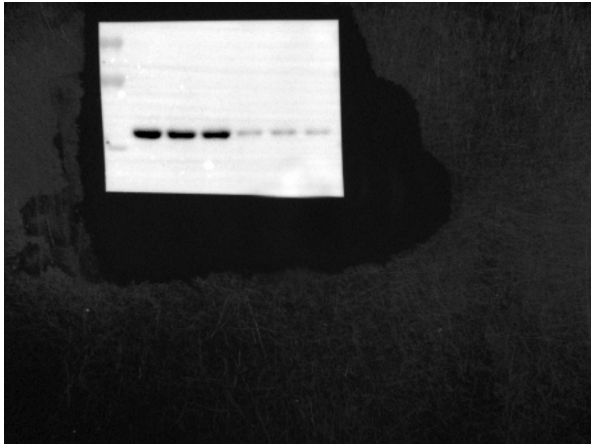

**RNF5**

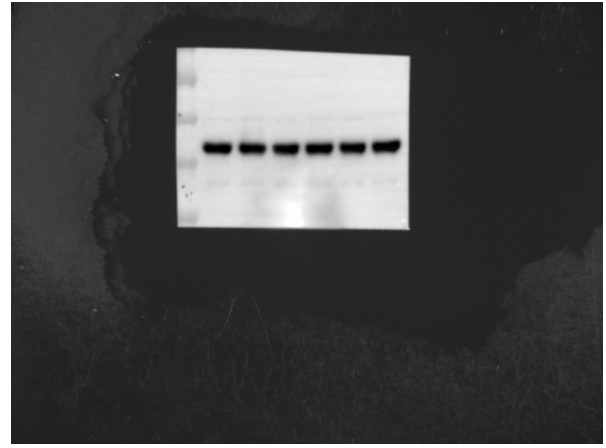

**GAPDH**

**Figure4-D**

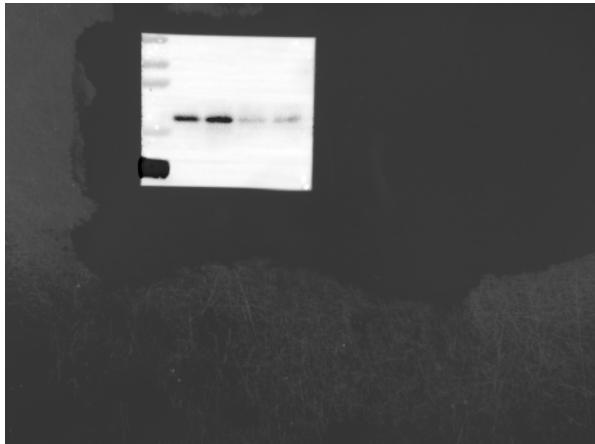

**RNF5**

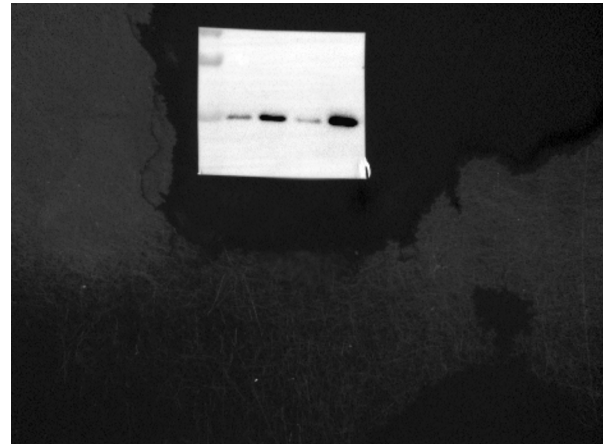

**ANP**

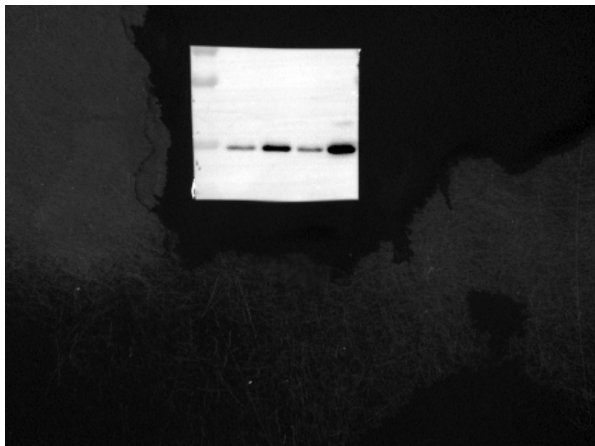

**BNP**

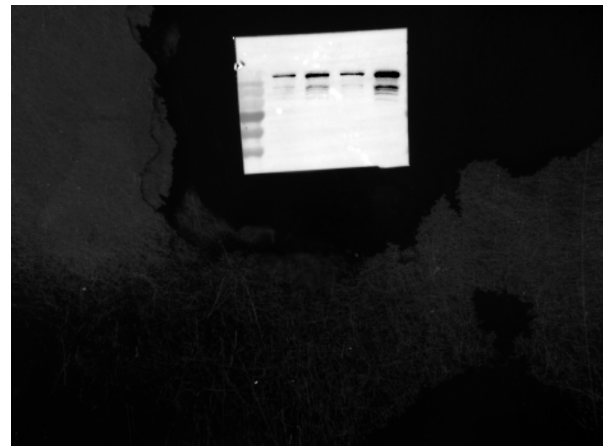

**MYH7**

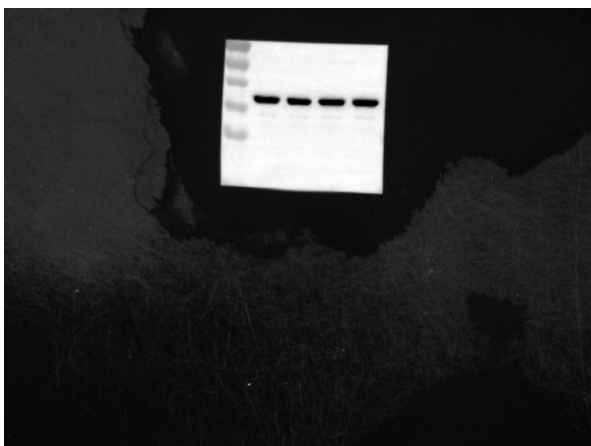

**GAPDH**

**Figure4-E**

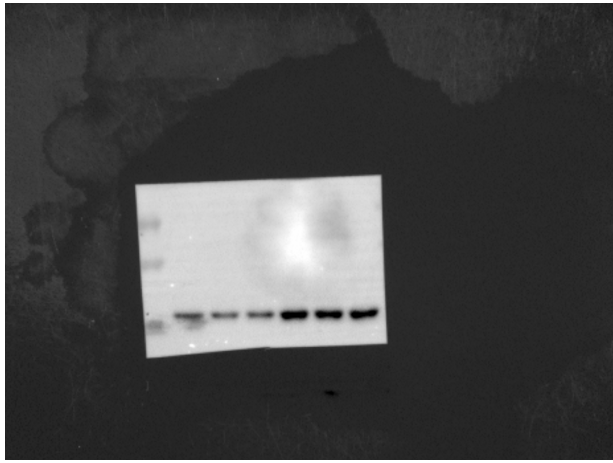

**FLAG**

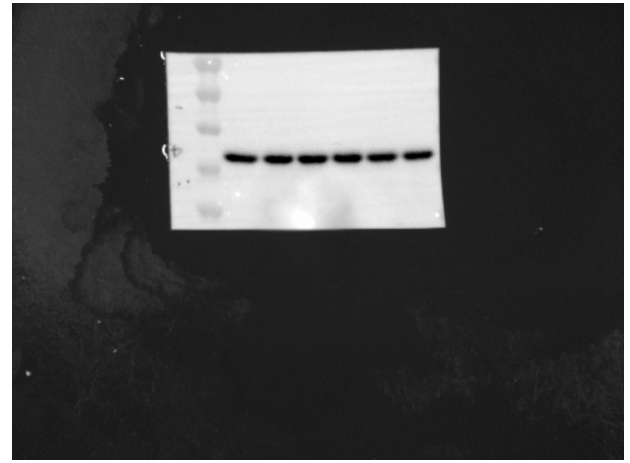

**GAPDH**

**Figure4-H**

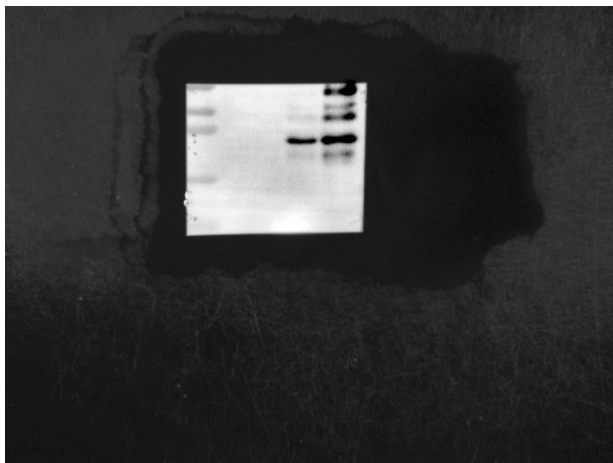

**FLAG**

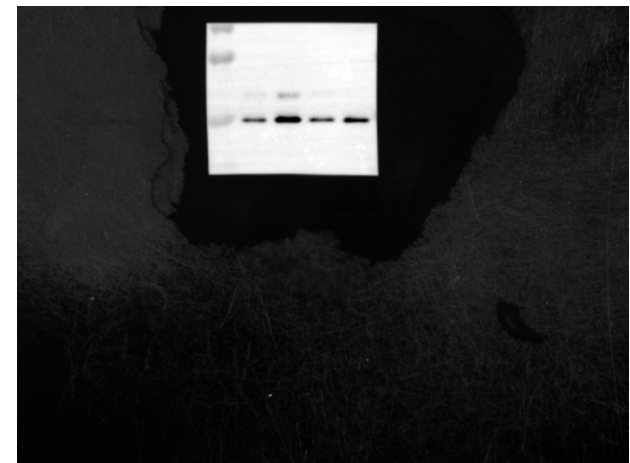

**ANP**

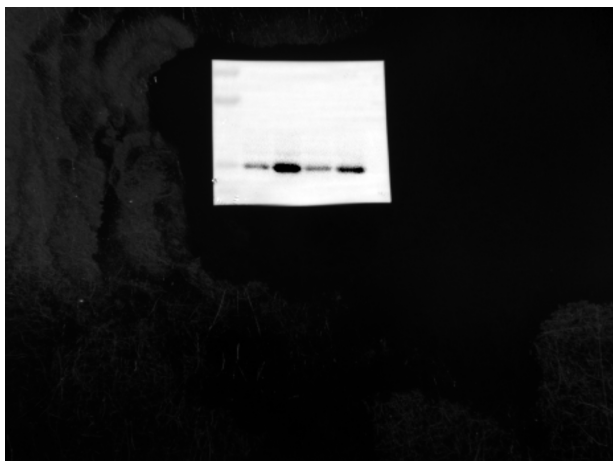

**BNP**

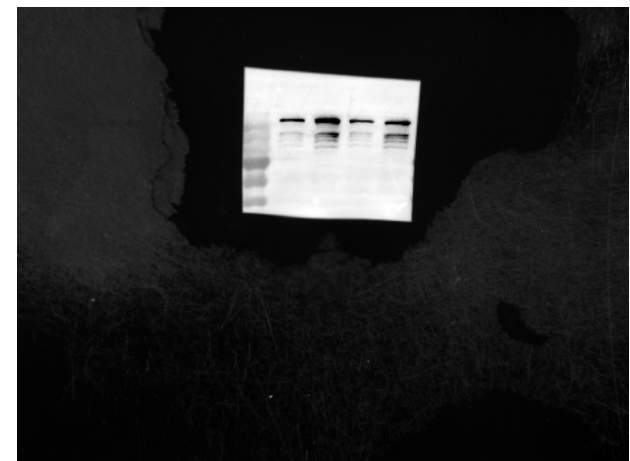

**MYH7**

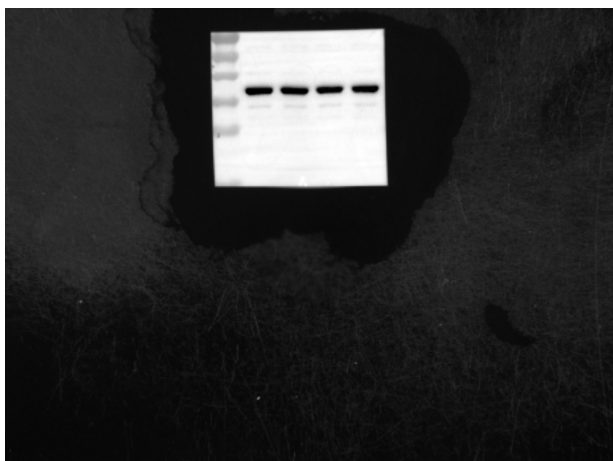

**GAPDH**

**Figure6-C-left**

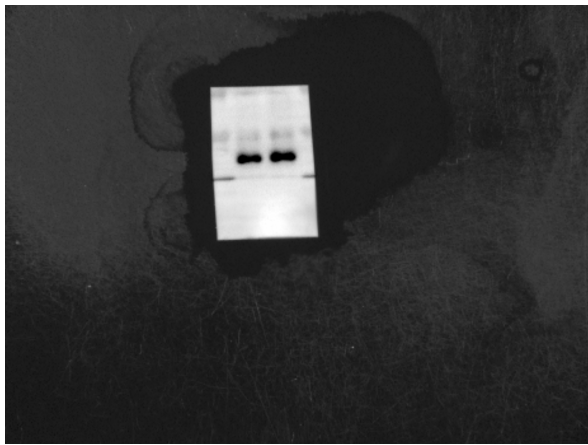

**IN FLAG**

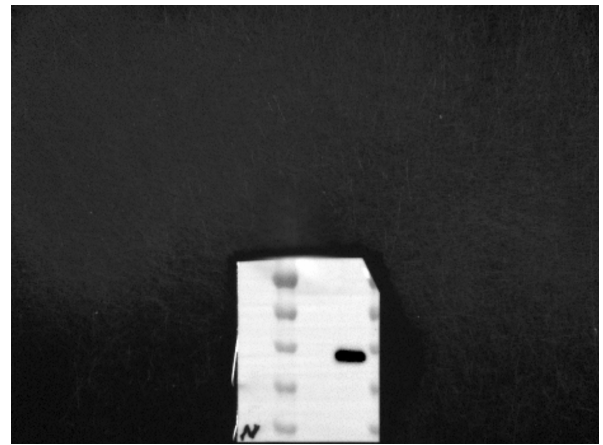

**IN MYC**

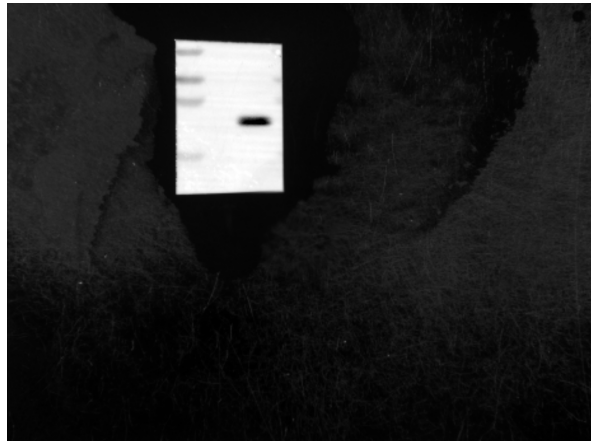

**IP FLAG**

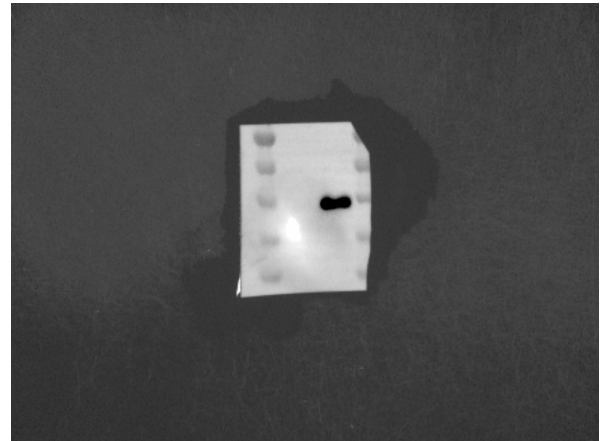

**IP MYC**

**Figure6-C-right**

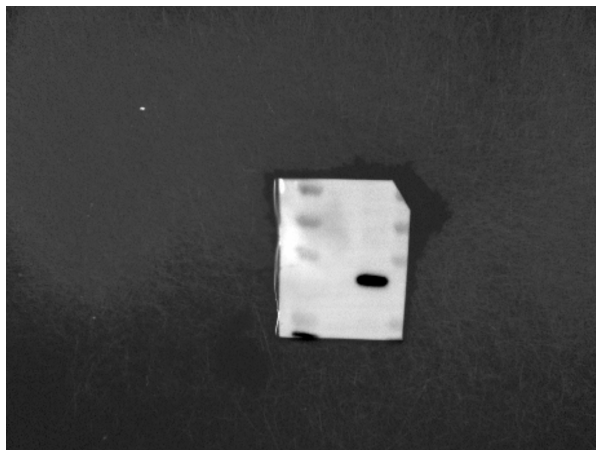

**IN FLAG**

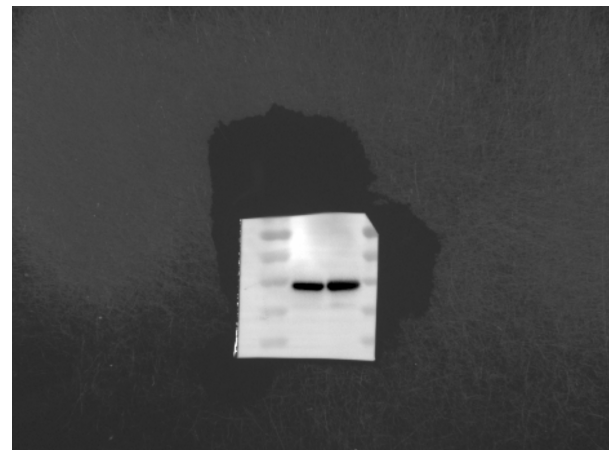

**IN MYC**

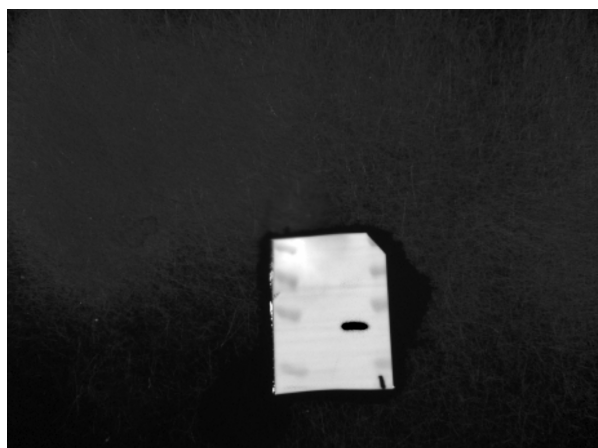

**IP FLAG**

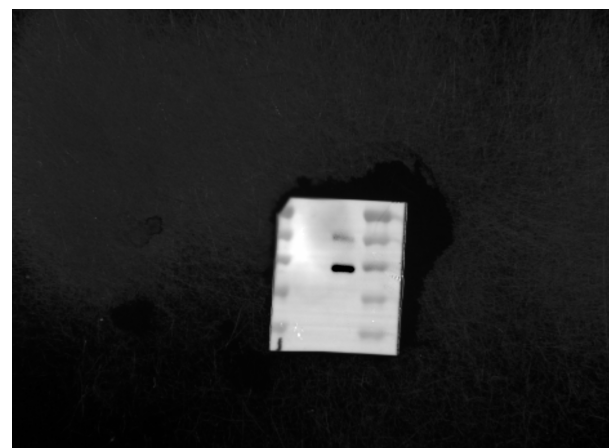

**IP MYC**



**Figure6-D**

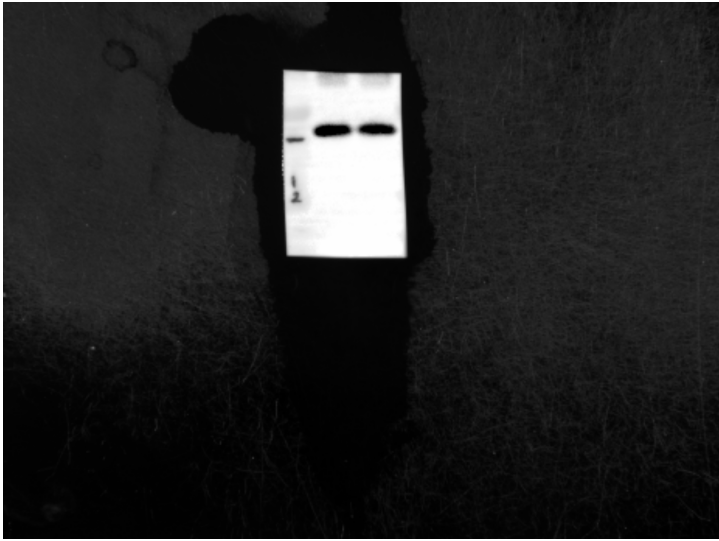

**IN FLAG**

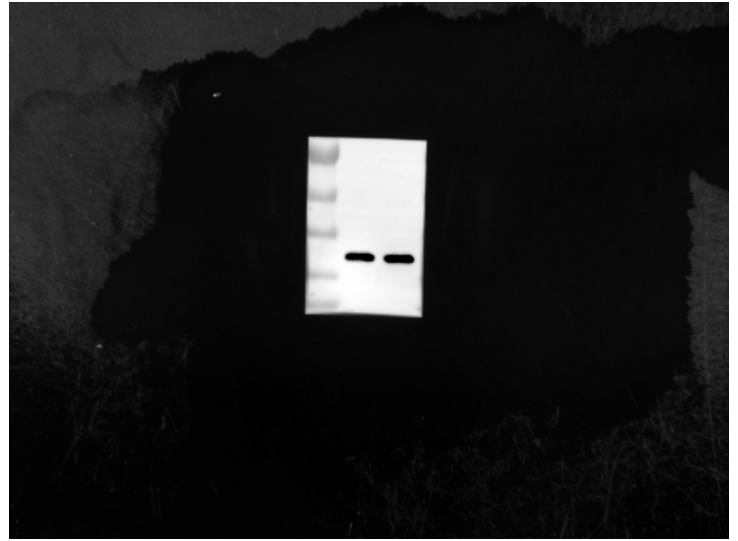

**IN STING**

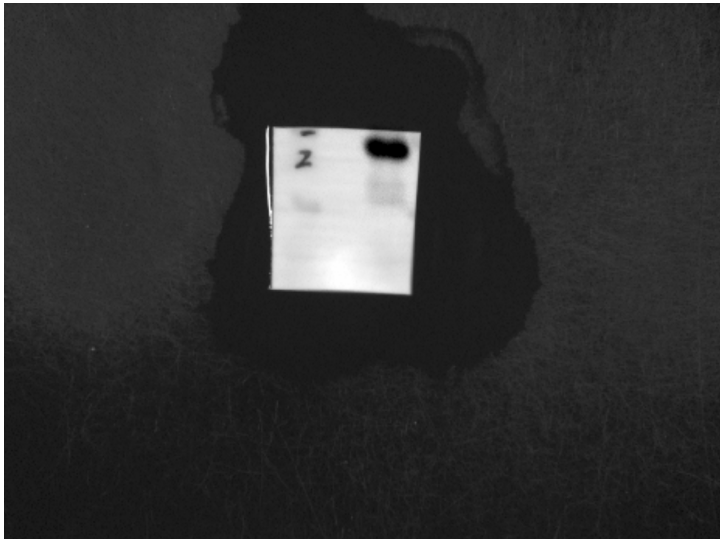

**IP FLAG**

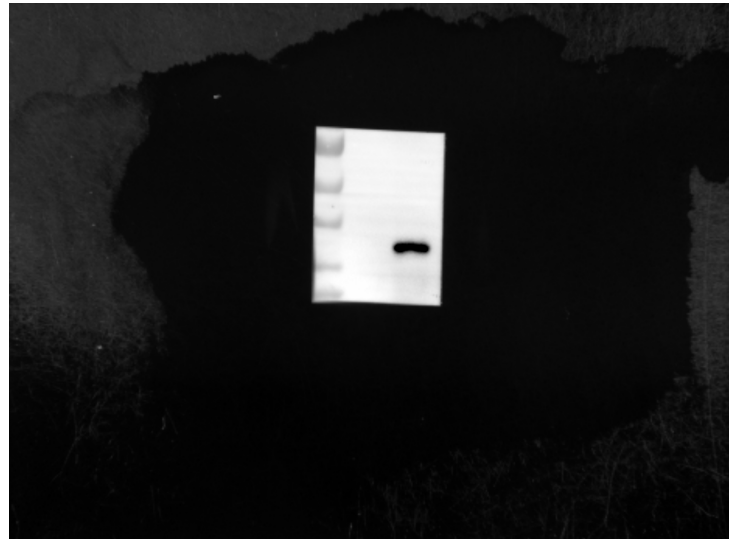

**IP STING**

**Figure6-E-left**

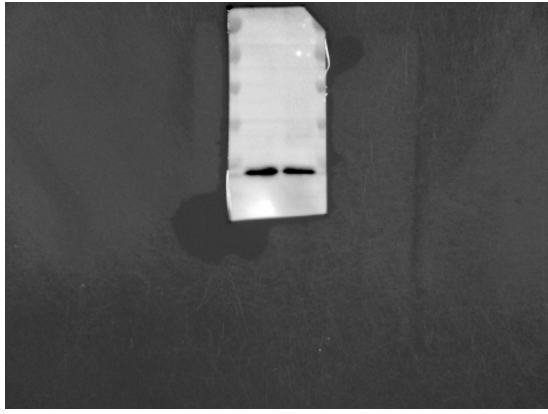

**IN FLAG**

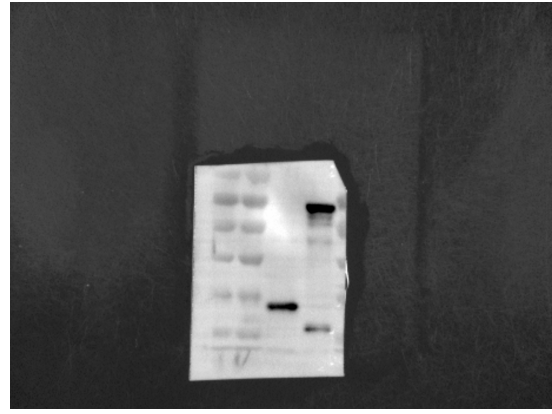

**IN HA**

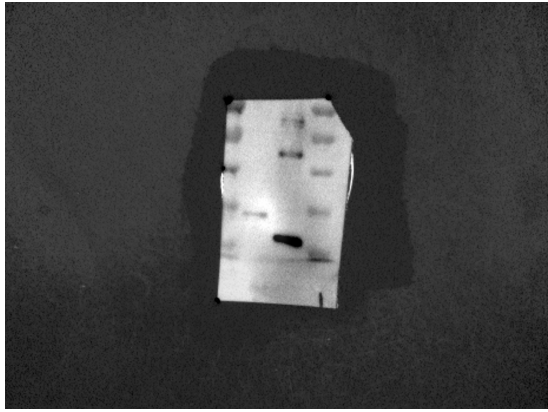

**IP FLAG**

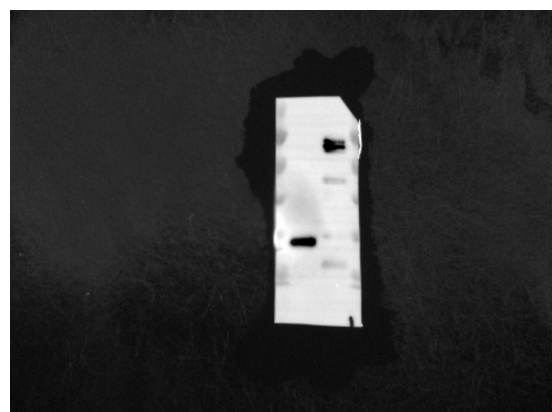

**IP HA**

**Figure6-E-right**

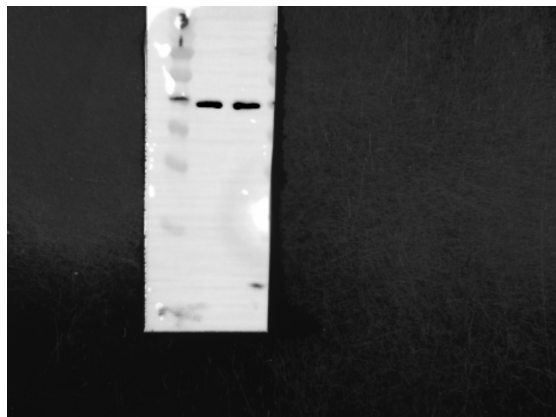

**IN FLAG**

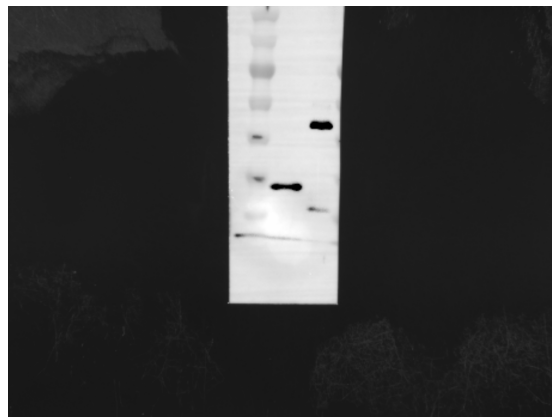

**IN HA**

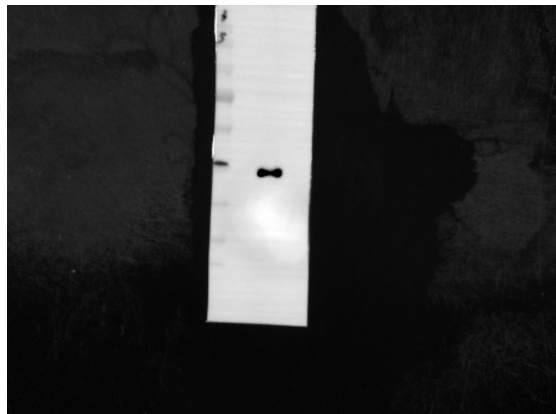

**IP FLAG**

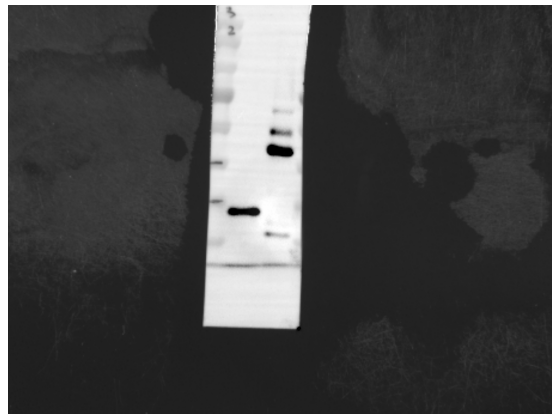

**IP HA**

**Figure6-F**

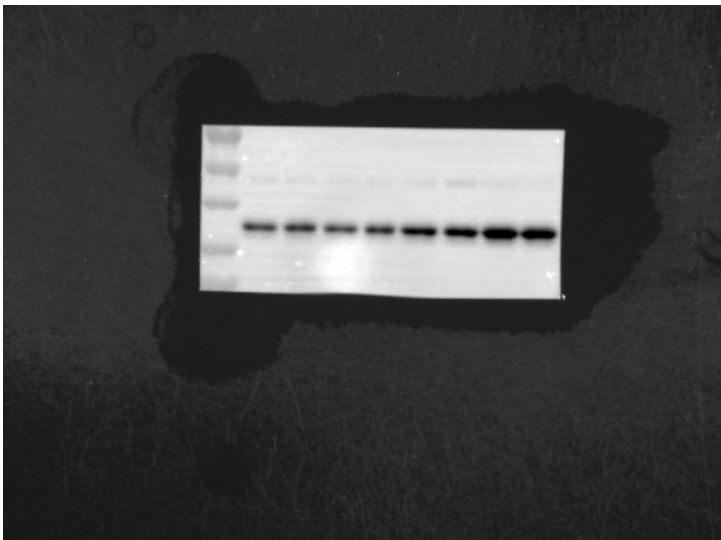

**STING**

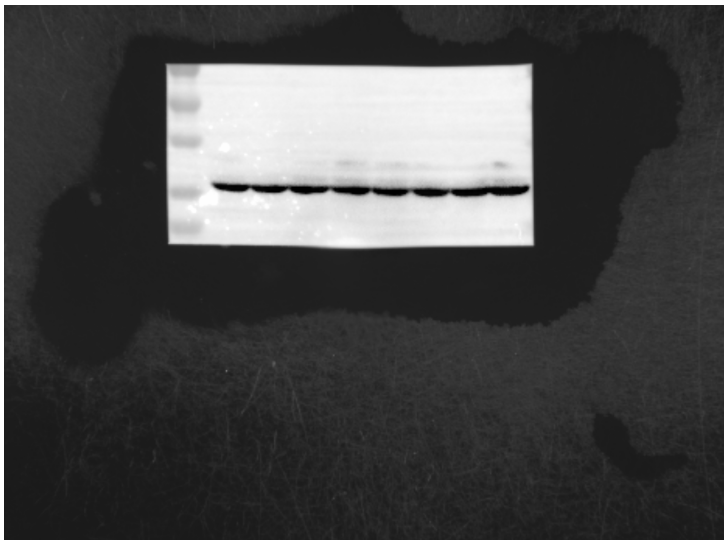

**GAPDH**

**Figure6-G**

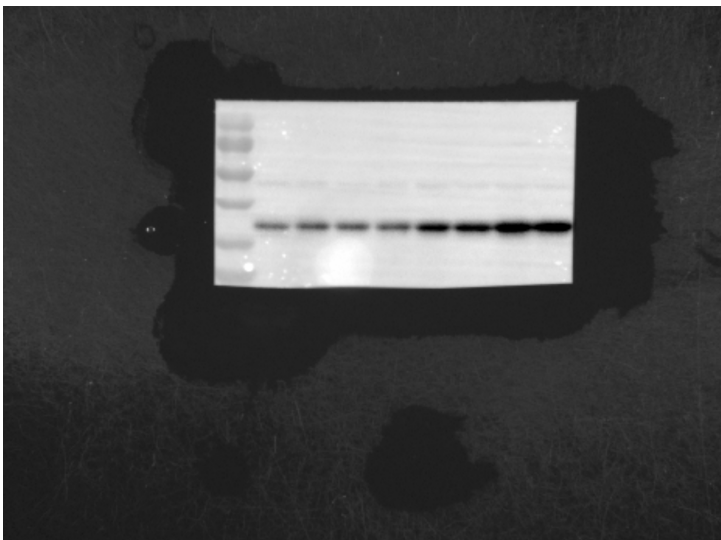

**STING**

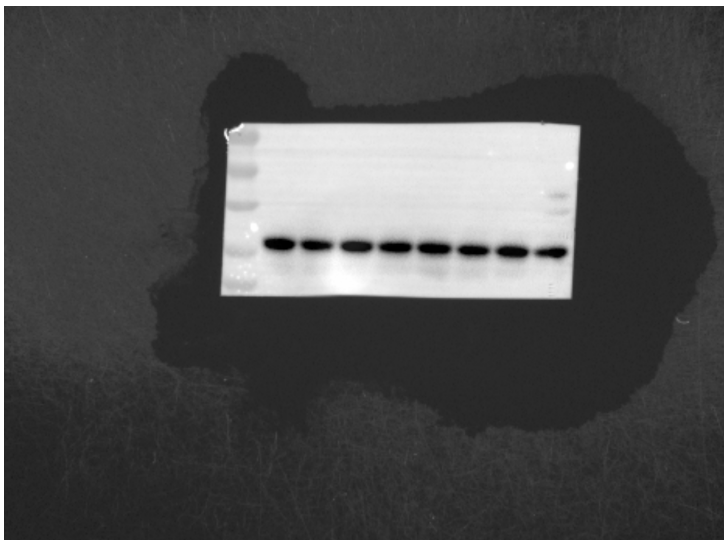

**GAPDH**

**Figure6-H**

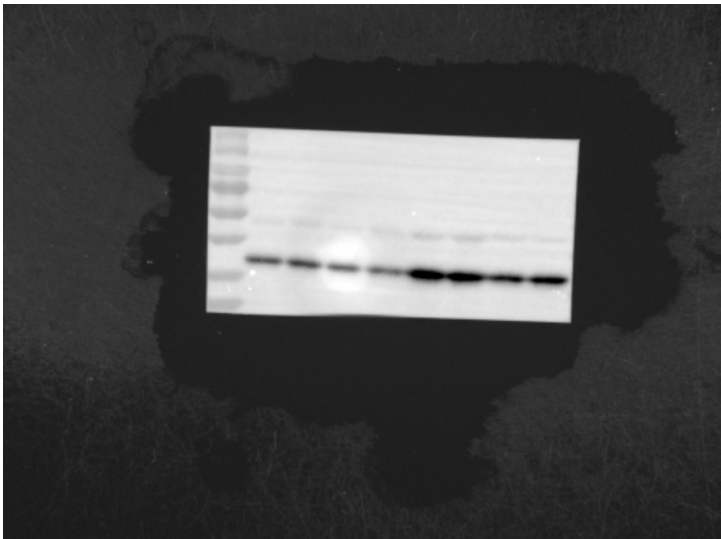

**STING**

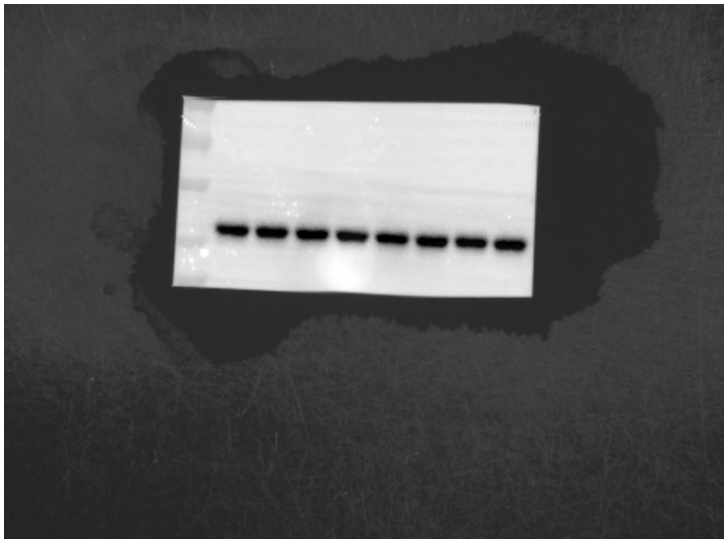

**GAPDH**

**Figure7-A**

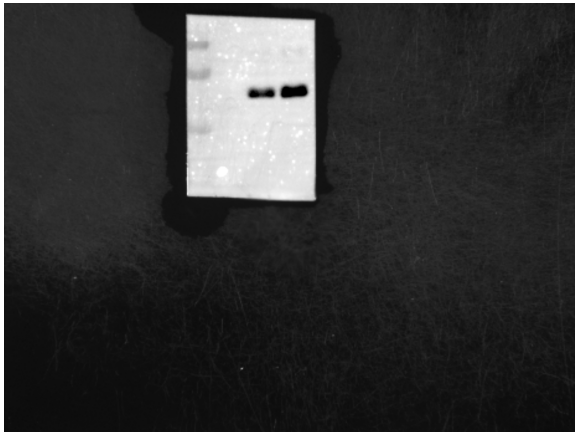

**FLAG**

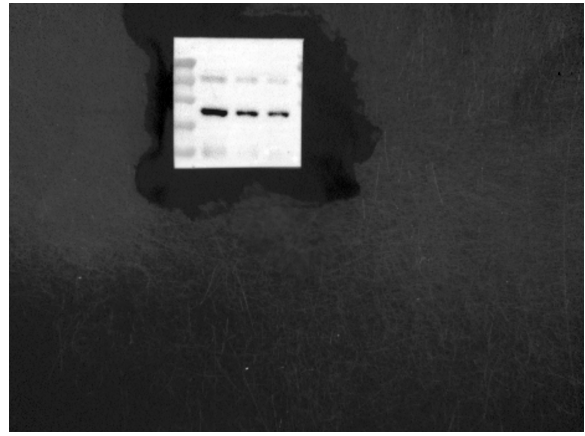

**STING**

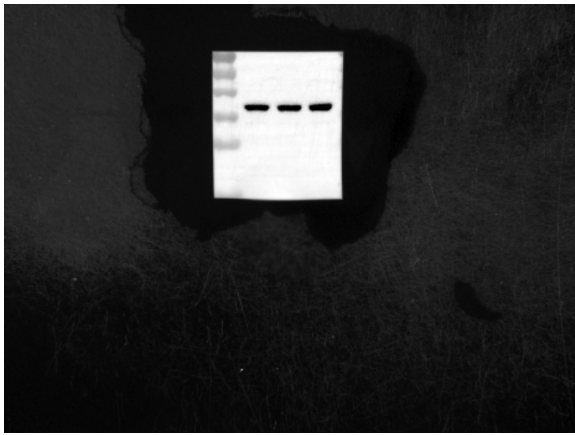

**GAPDH**

**Figure7-B**

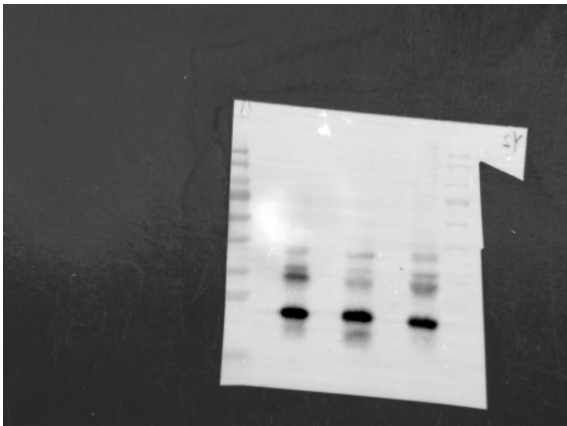

**FLAG**

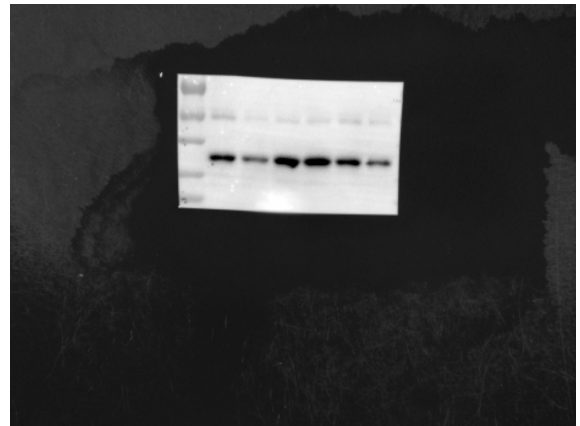

**STING**

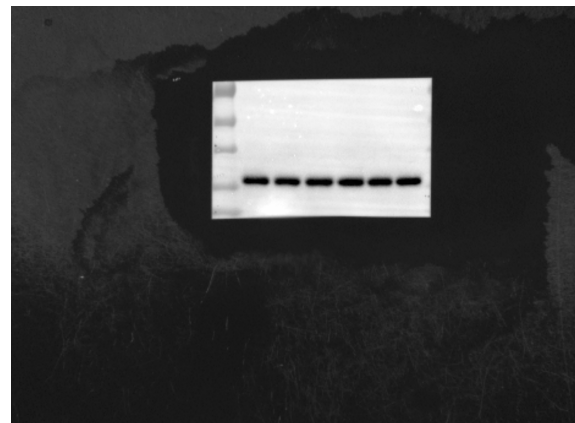

**GAPDH**

**Figure7-C**

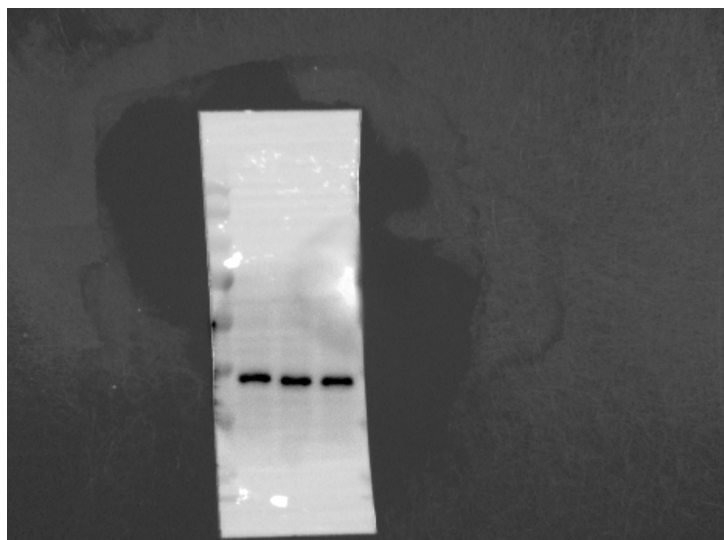

**IN FLAG**

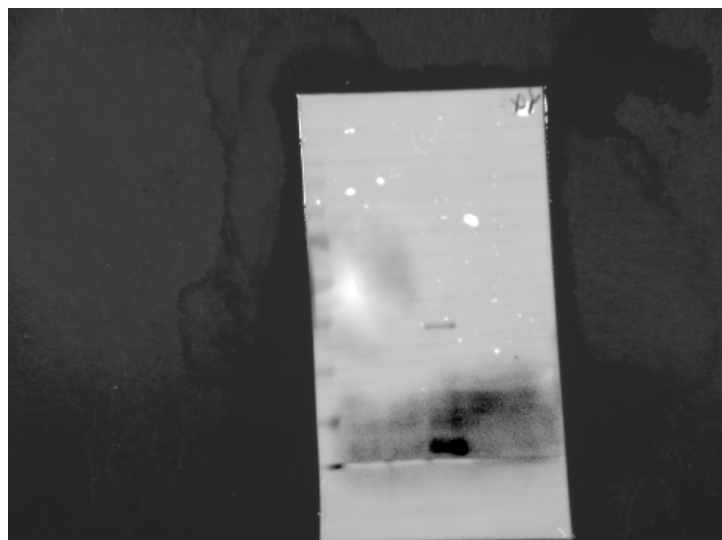

**IN HA**

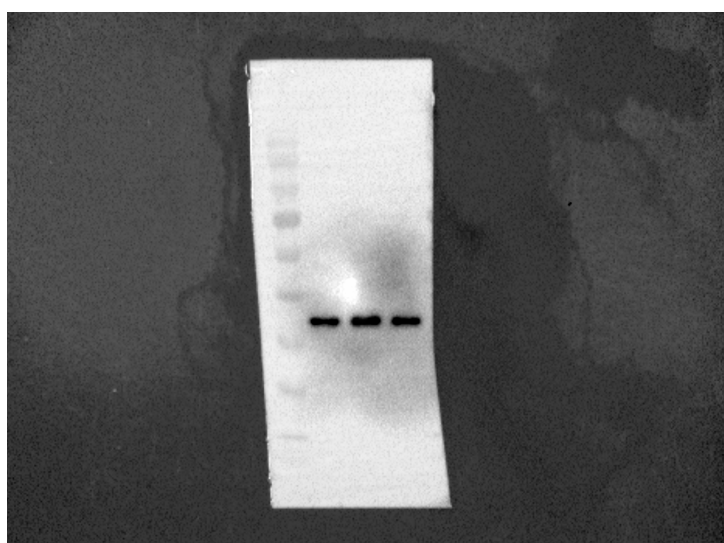

**GAPDH**

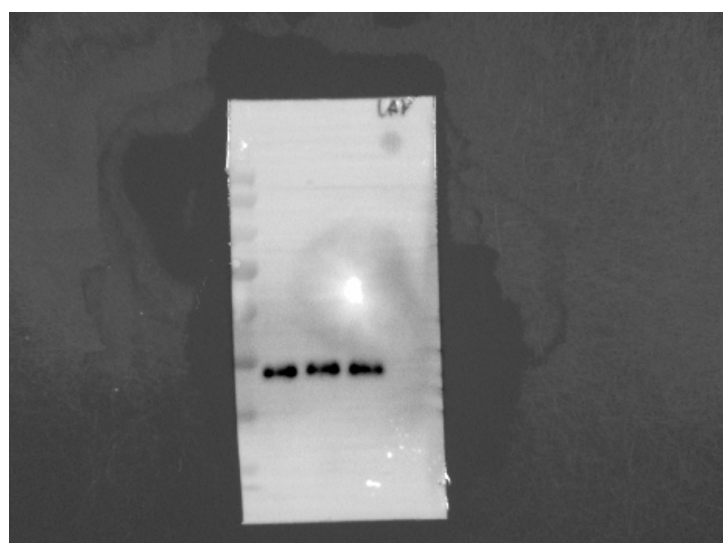

**IP FLAG**

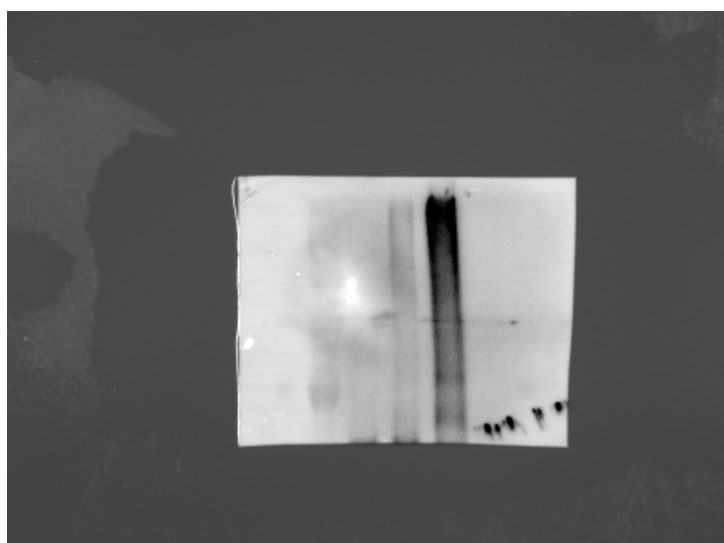

**IP MYC**

**Figure7-D**

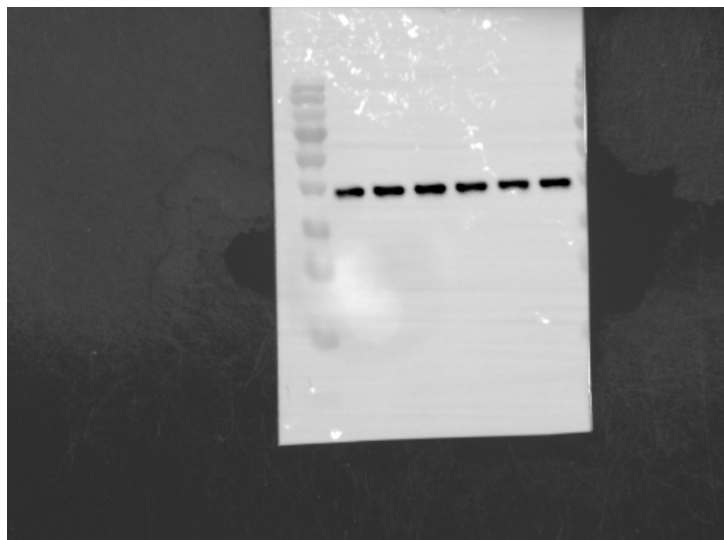

**IN FLAG**

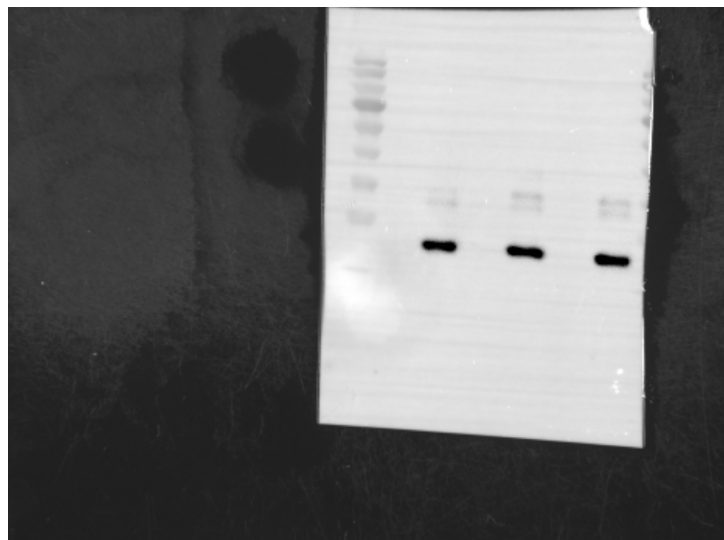

**IN HA**

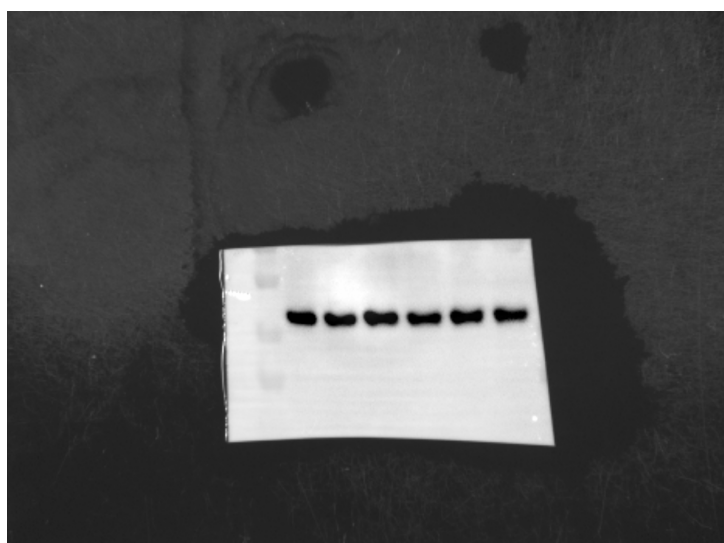

**GAPDH**

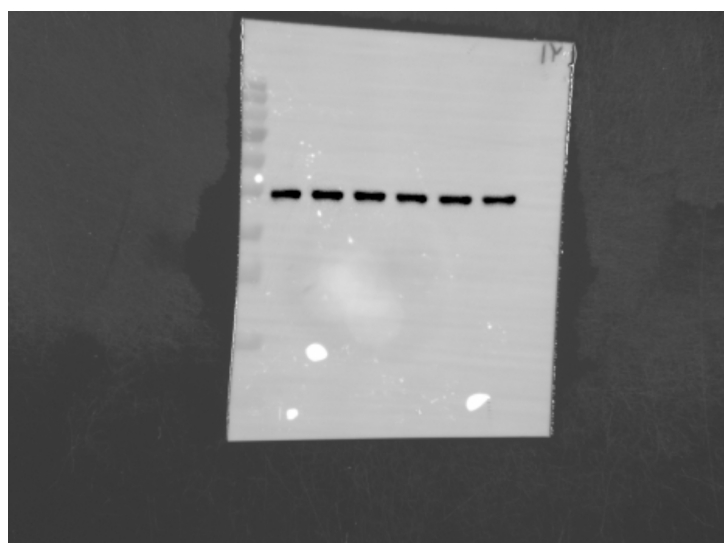

**IP FLAG**

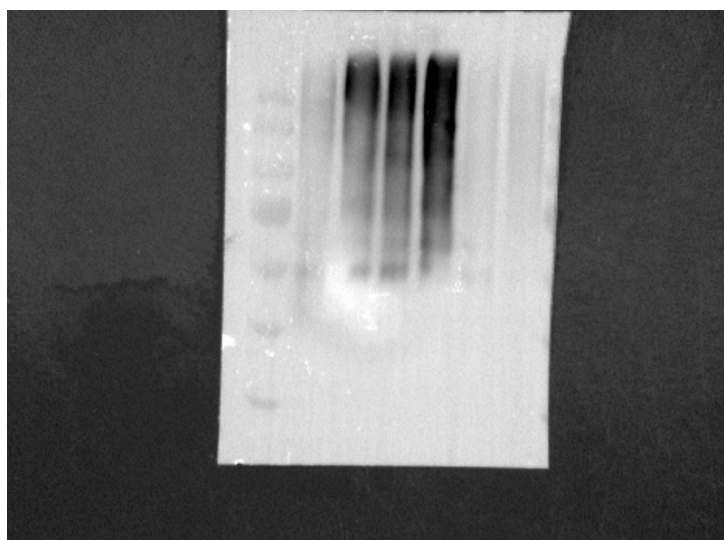

**IP MYC**

**Figure7-E**

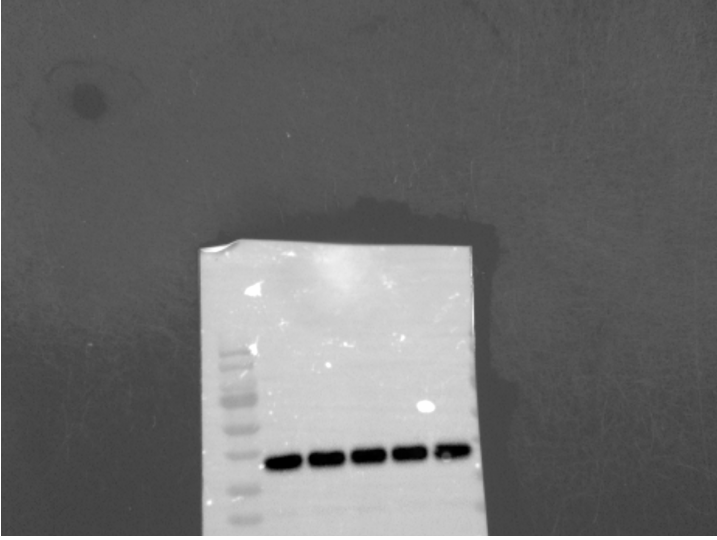

**IN FLAG**

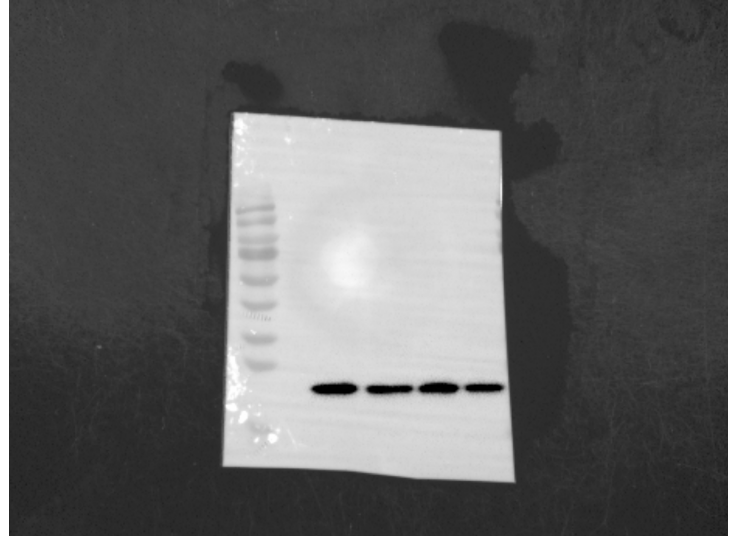

**IN HA**

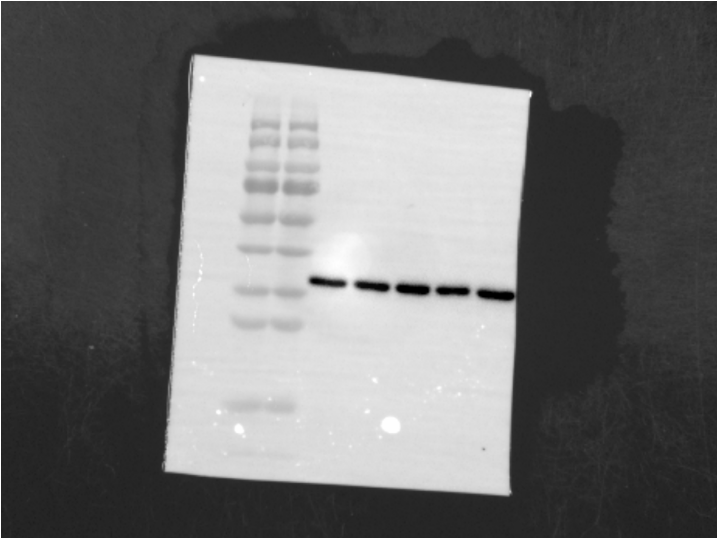

**GAPDH**

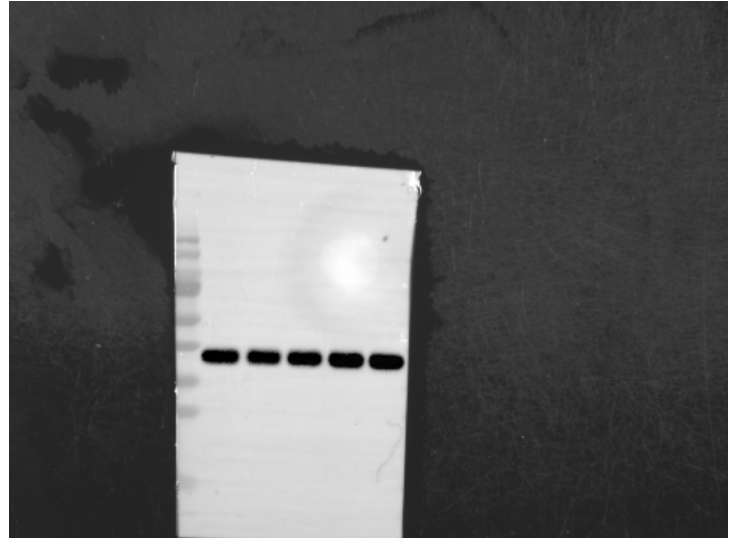

**IP FLAG**

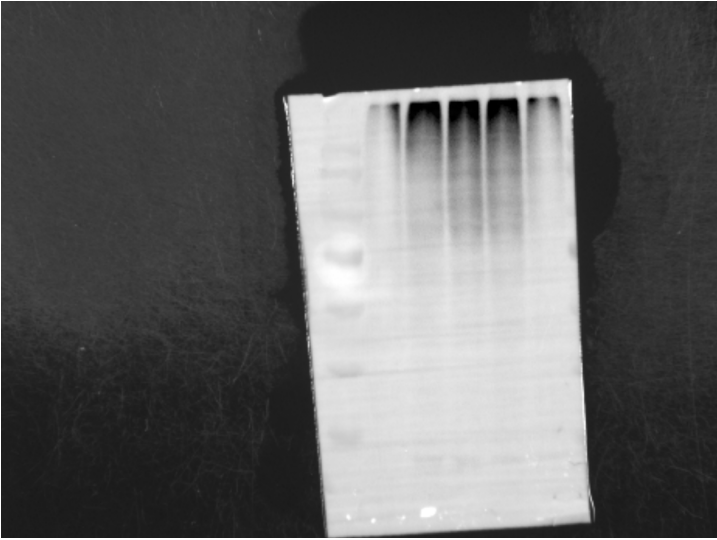

**IP MYC**

**Figure7-F**

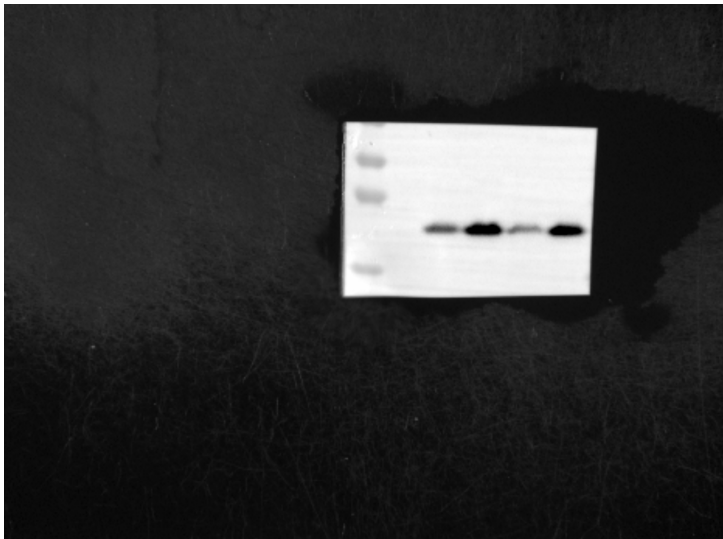

**FLAG**

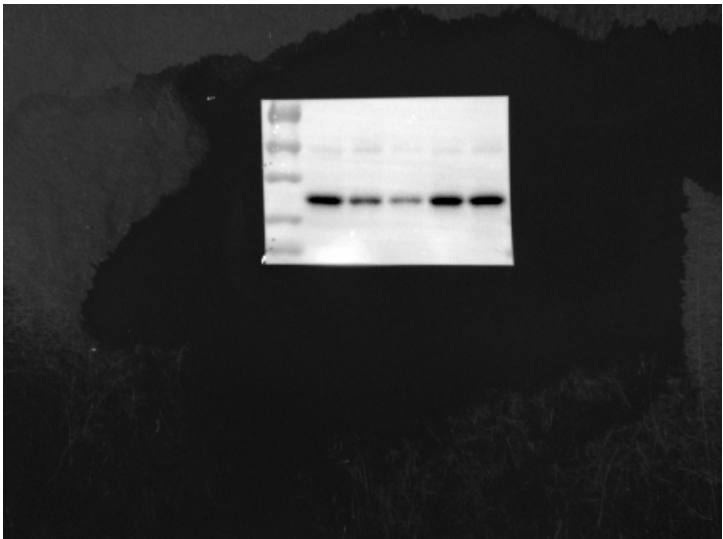

**STING**

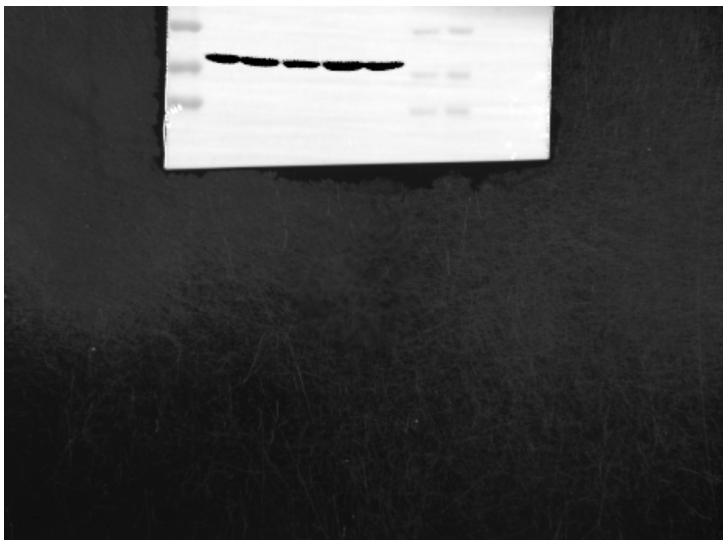

**GAPDH**



Figure7-G

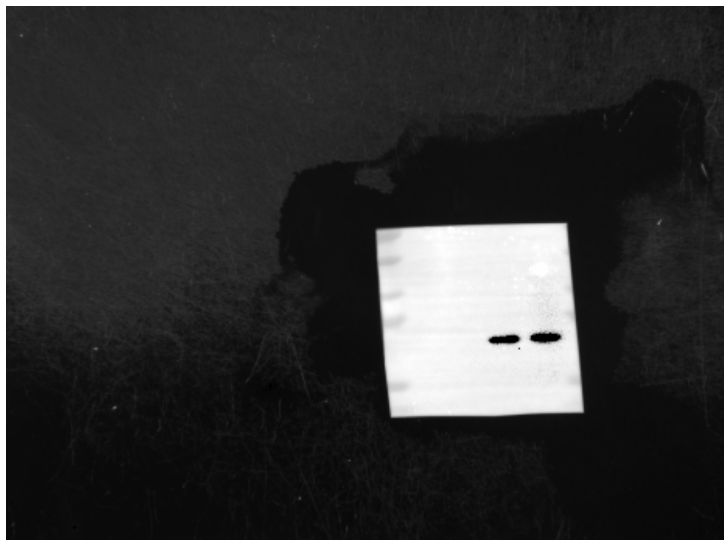

IN FLAG

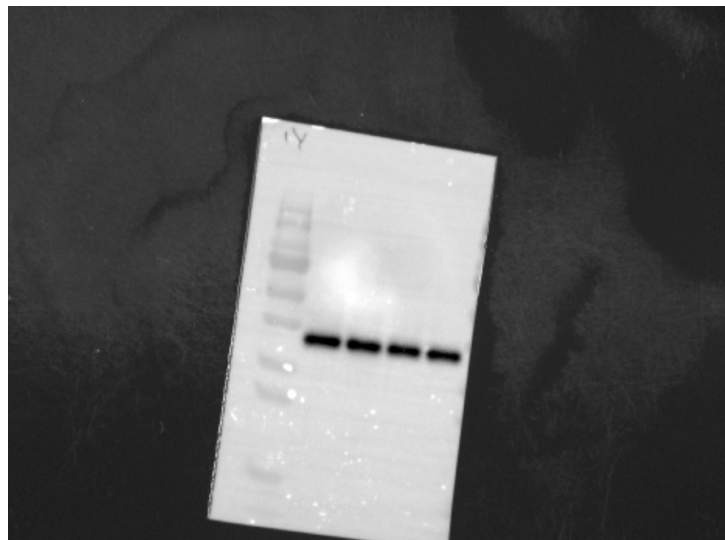

IN HA

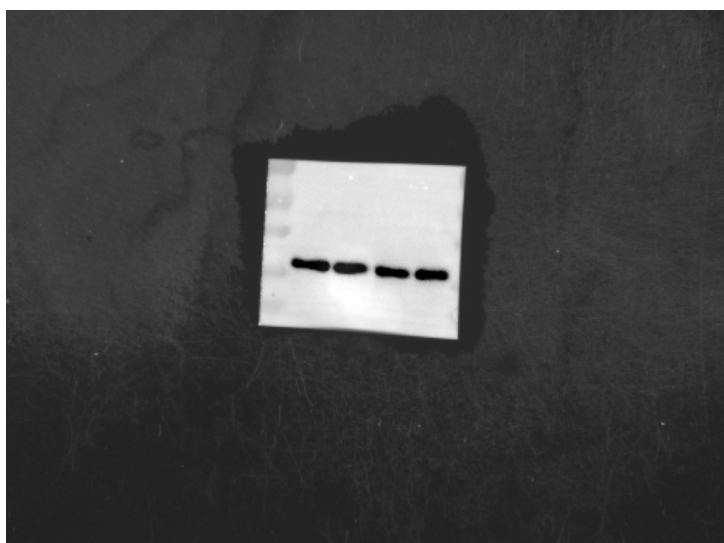

GAPDH

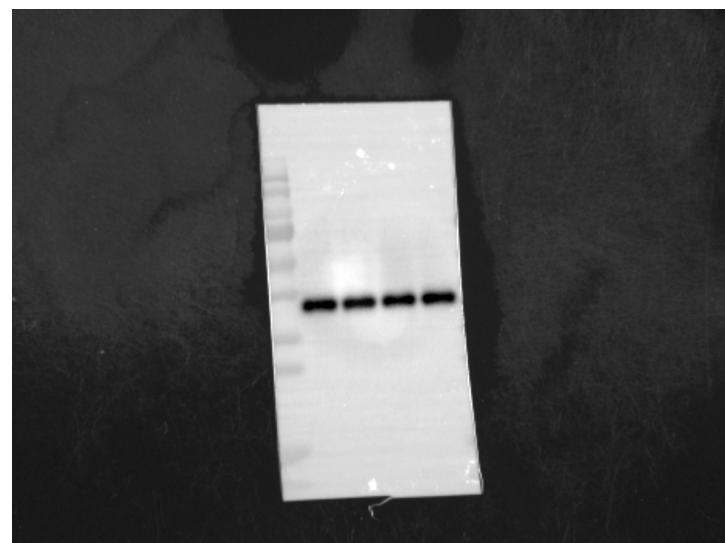

IP HA

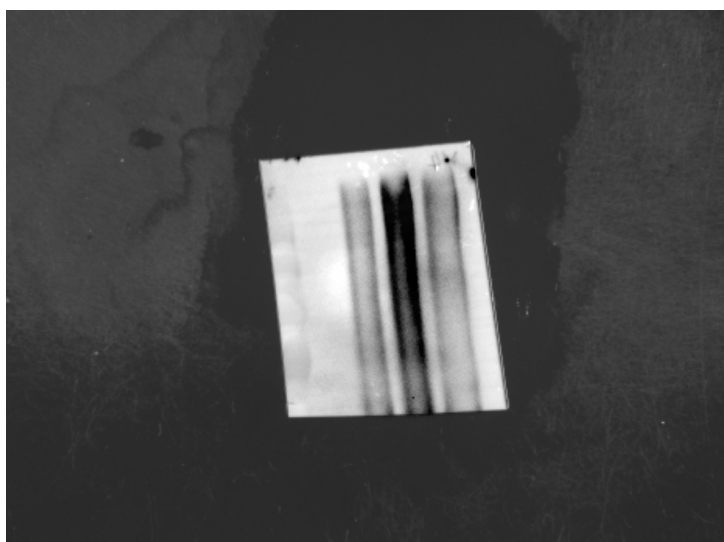

IP MYC

**Figure7-I**

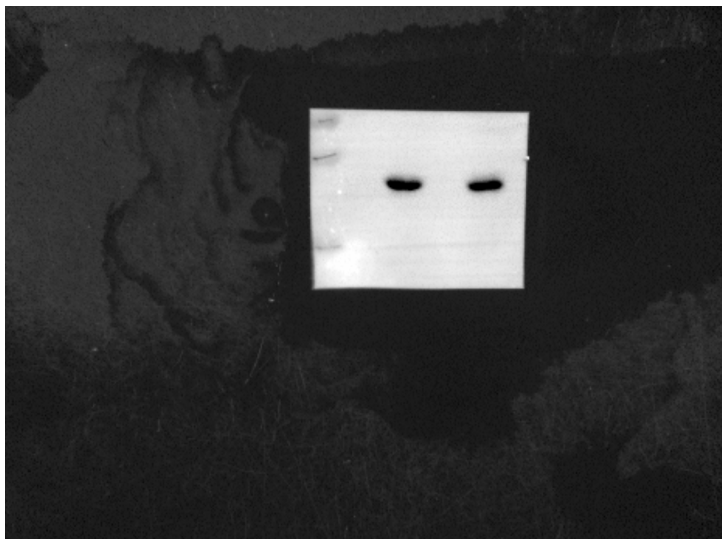

**FLAG RNF5**

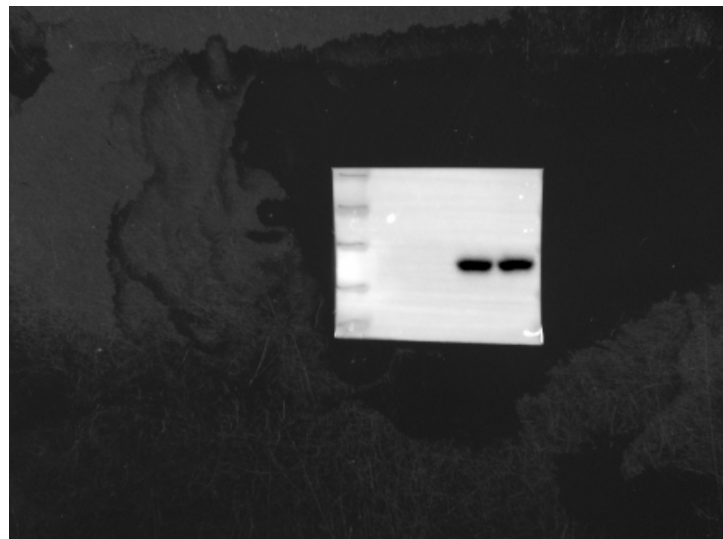

**FLAG STING**

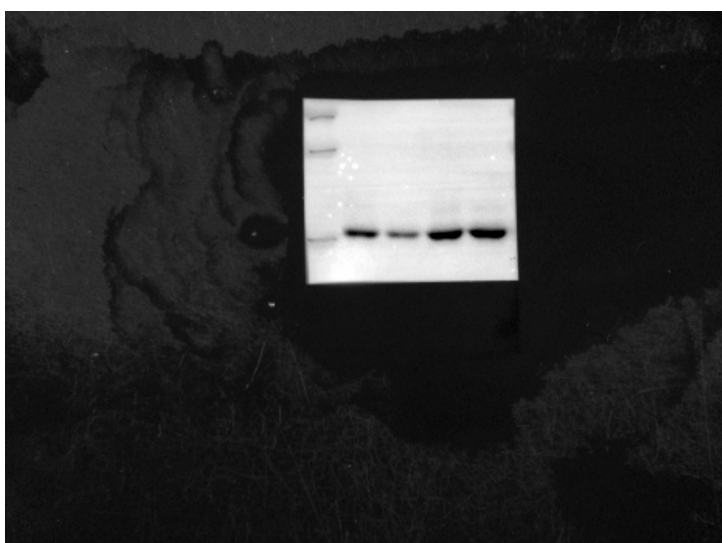

**ANP**

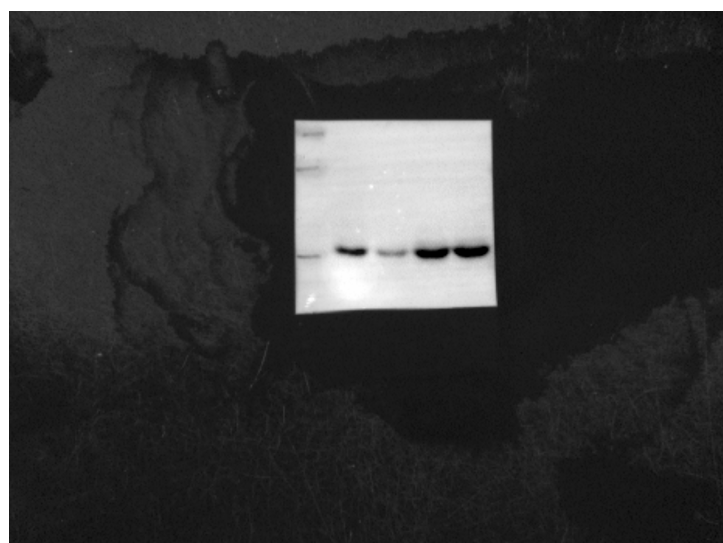

**BNP**

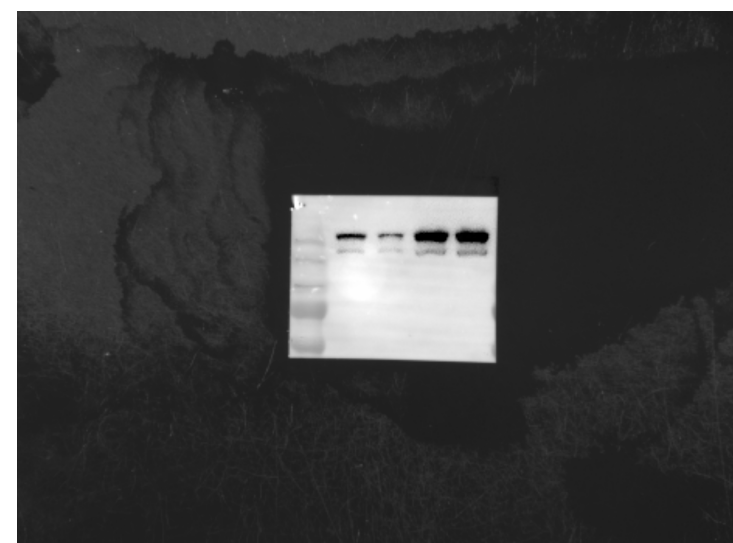

**MYH7**

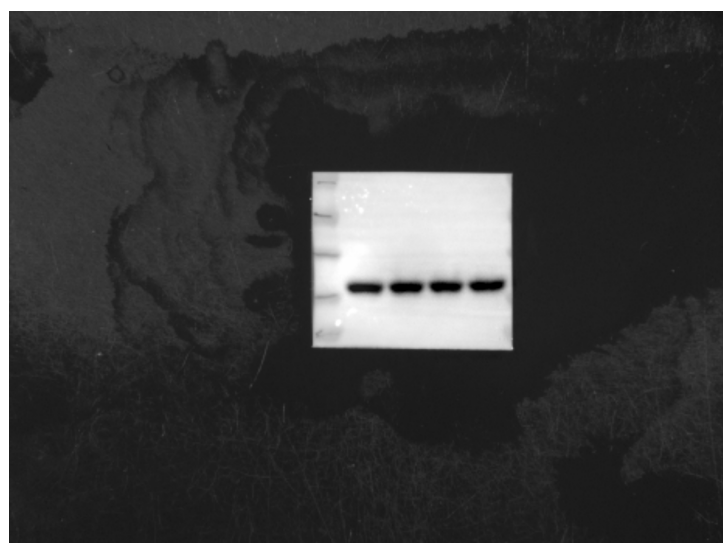

**GAPDH**
